1 **Optimizing antibiotic use in Indonesia: a systematic review and synthesis of current**  
2 **evidence to inform opportunities for intervention**

3

4 **Authors**

5 Ralalicia Limato<sup>1,2</sup>, Gilbert Lazarus<sup>1,3</sup>, Puck Dernison<sup>1,4</sup>, Manzilina Mudia<sup>1</sup>, Monik Alamanda<sup>1</sup>, Erni  
6 J. Nelwan<sup>3,5</sup>, Robert Sinto<sup>3,5</sup>, Anis Karuniawati<sup>3,6</sup>, H. Rogier van Doorn<sup>2,7</sup>, Raph L. Hamers<sup>1,2\*</sup>

7

8 **Affiliations**

9 1. Eijkman-Oxford Clinical Research Unit, Jakarta, Indonesia

10 2. Centre for Tropical Medicine and Global Health, Nuffield Department of Medicine, University of  
11 Oxford, Oxford, UK

12 3. Faculty of Medicine, Universitas Indonesia, Jakarta, Indonesia

13 4. Faculty of Health Sciences, Radboud University Medical Centre, Nijmegen, The Netherlands

14 5. Department of Internal Medicine, Division of Infectious Diseases, Cipto Mangunkusumo  
15 National General Hospital, Jakarta, Indonesia

16 6. Cipto Mangunkusumo National General Hospital, Jakarta, Indonesia

17 7. Oxford University Clinical Research Unit, Hanoi, Vietnam

18

19 **\* Corresponding author**

20 Raph L. Hamers MD PhD

21 Email : [raph.hamers@ndm.ox.ac.uk](mailto:raph.hamers@ndm.ox.ac.uk)

22 Phone : +62 21 31900971

23 **Word count** 4650; **References** 158; **Inserts:** Figures 4; Tables 2; **Supplementary file:** Figures  
24 15; Tables 8

25 **PROSPERO registration number:** CRD42019134641

26 **ABSTRACT**

27

28 **Introduction** A major driver of antimicrobial resistance (AMR) and poor clinical outcomes is  
29 suboptimal antibiotic use, although data are lacking in low-resource settings. We reviewed studies  
30 on systemic antibiotic use (WHO ATC/DDD category J01) for human health in Indonesia, and  
31 synthesized available evidence to identify opportunities for intervention.

32 **Methods** We systematically searched five international and national databases for eligible peer-  
33 reviewed articles, in English and Indonesian, published between 1 January 2000 and 1 June 2021  
34 including: 1) antibiotic consumption; 2) prescribing appropriateness; 3) antimicrobial stewardship  
35 (AMS); 4) perceptions among consumers and providers. Two independent reviewers included  
36 studies and extracted data. Study-level data were summarized using random-effects model meta-  
37 analysis for consumption and prescribing appropriateness, effect direction analysis for AMS  
38 interventions, and qualitative synthesis for perception surveys. (PROSPERO CRD42019134641)

39 **Results** Of 9323 search hits, we included 100 reports on antibiotic consumption (20), prescribing  
40 appropriateness (49), AMS (13), and/or perception (25) (8 categorized in >1 domain). The pooled  
41 estimate of overall antibiotic consumption was 110.1 DDD/100 patient-days (95%CI98.5-121.6),  
42 with ceftriaxone, ampicillin and levofloxacin being most consumed. Pooled estimates for overall  
43 appropriate prescribing (according to Gyssens method) were 33.5% (95%CI18.1-53.4%) in  
44 hospitals and 49.4% (95%CI23.7-75.4%) in primary care. Pooled estimates for appropriate  
45 prescribing (according to reference guidelines) were, in hospitals, 99.7% (95%CI97.4-100%) for  
46 indication, 84.9% (95%CI38.5-98.0%) for drug choice, and 6.1% (95%CI0.2-63.2%) for overall  
47 appropriateness, and, in primary care, 98.9% (95%CI60.9-100%) for indication, 82.6%  
48 (95%CI50.5%-95.7%) for drug choice and 10.5% (95%CI0.8-62.6%) for overall appropriateness.  
49 The few AMS intervention studies conducted to date suggested potential to reduce antibiotic  
50 consumption and improve prescribing appropriateness. Key themes identified in perception  
51 surveys were lack of antibiotic knowledge among consumers and non-prescription antibiotic self-  
52 medication.

53 **Conclusions** Context-specific strategies are urgently needed to improve rational antibiotic use in  
54 Indonesian hospitals and communities, with critical evidence gaps concerning private and informal  
55 health providers.

56

57 **Key words:** antibiotic use; antibiotic consumption; antibiotic stewardship; Indonesia; systematic  
58 review; meta-analysis

## 59 **KEY QUESTIONS**

60

### 61 **What is already known?**

- 62 • Indonesia is a potential AMR hotspot, where, based on pharmaceutical sales data, antibiotic  
63 consumption increased 2.5-fold between 2000 and 2015, mostly driven by broad-spectrum  
64 penicillins, fluoroquinolones and cephalosporins.
- 65 • Representative contemporary data on antibiotic use are lacking, although anecdotal data  
66 suggest antibiotic overuse in the healthcare system, widespread over-the-counter use in  
67 communities, and high rates of AMR mostly among common Gram-negative bacteria.
- 68 • A comprehensive review on antibiotic use in human health in Indonesia has not been  
69 conducted to date.

### 70 **What are the new findings?**

- 71 • Available data spanning the past 20 years, suggested that only 34% and 49% of antibiotics  
72 were appropriately prescribed in hospital and primary care settings, respectively, although the  
73 quality of the evidence was low.
- 74 • Publications evaluating AMS interventions have been sparse to date, demonstrating the need  
75 to strengthen the local research base to develop context-specific and sustainable AMS  
76 models.
- 77 • Community surveys suggested important gaps in antibiotic knowledge, and that non-  
78 prescription antibiotic self-medication is common practice, although data to quantify this  
79 problem and its drivers are lacking.

### 80 **What do the new findings imply?**

- 81 • Available evidence synthesised in this Review provides important insights in the magnitude  
82 and patterns of antibiotic use, and associated patient and health system factors, which helps  
83 define opportunities for optimising responsible antibiotic use.
- 84 • Critical evidence gaps exist on informal and formal private health care providers, geographic  
85 areas outside of Java Island, as well as effective AMS models that consider country-specific  
86 socio-cultural, economic and political circumstances.

- 87 • Optimization of antimicrobial use as a means to tackle AMR should be a priority of the national  
88 agenda for universal health coverage.

## 89 INTRODUCTION

90

91 The global rise in antimicrobial resistance (AMR) is considered one of the greatest public health  
92 threats worldwide, with a disproportionate impact in low- and middle-income countries (LMIC).<sup>1</sup> A  
93 recent global analysis estimated that AMR was directly responsible for 1.27 million deaths and  
94 played a part in 4.95 million deaths in 2019.<sup>1</sup> One of the major drivers of antimicrobial resistance  
95 (AMR) is antibiotic use, including their overuse and misuse, for human health.<sup>2,3</sup> In low-resource  
96 settings, lack of access to quality health care, vaccination, safe water and sanitation, leave many  
97 people vulnerable to infection and dependent on antibiotics for treatment, with their use largely  
98 unregulated. At the same time, access to life-saving drugs targeting the emerging resistant  
99 pathogens remains an issue in many settings. Globally, during the past decade concerted efforts  
100 have been made to develop strategies to preserve the effectiveness of existing antibiotic agents,  
101 although this has been partially set back because of the COVID-19 pandemic.<sup>4</sup>

102

103 Indonesia is a lower-middle-income country in Southeast Asia with the world's fourth largest  
104 population (274 million), and socio-economic conditions and health indicators vary widely across  
105 the archipelago. More than 55% of the population is concentrated on Java Island, which  
106 contributes around 59% to the national economy and has the best developed health  
107 infrastructure.<sup>5</sup> Based on pharmaceutical sales data between 2000 and 2015, Indonesia ranks  
108 among the greatest risers in antibiotic consumption (29<sup>th</sup> of 76 countries).<sup>3</sup> A range of complex  
109 factors, including variable access to quality health care, persistently high infectious disease  
110 burdens,<sup>6</sup> and weakly enforced antibiotic policies, render Indonesia particularly vulnerable to  
111 AMR.<sup>5-7</sup> The implementation of the National Action Plan for AMR, launched in 2017<sup>8,9</sup> has been  
112 hindered due to, among other factors, a limited evidence base of AMR epidemiology, antibiotic  
113 utilisation and rational prescribing practices.<sup>7</sup>

114

115 We systematically reviewed the scientific literature on antibiotic use for human health, in both  
116 hospital and primary care settings, in Indonesia spanning the past 20 years. This Review focused  
117 on four key domains: 1) antibiotic consumption; 2) appropriateness of antibiotic prescribing; 3)

118 AMS interventions; 4) knowledge, attitudes and perceptions among consumers and providers. This  
119 Review also reflects on current progress in the National Action Plan for AMR, and defines  
120 evidence gaps and context-specific priorities for action.

## 121 **METHODS**

122

### 123 **Search strategy and selection criteria**

124 This systematic review was reported according to the Preferred Reporting Items for Systematic  
125 Reviews and Meta-analyses (PRISMA) 2020 guidelines.<sup>10</sup> A detailed protocol has been  
126 prospectively registered in the PROSPERO database (CRD42019134641). Data for this  
127 systematic review were identified through the screening of five international (PubMed, EMBASE  
128 and Google Scholar) and national (Garuda [Garba Rujukan Digital] and Neliti) electronic  
129 bibliographic databases. Reference screening was used to identify additional relevant papers. The  
130 review was limited to antibacterials for systematic human use (J01 category in WHO ATC/DDD  
131 index). Only peer-reviewed original articles published in English or Indonesian between 1 January  
132 2000 and 1 June 2021 were included. Search terms covered all domains of this Review and  
133 combined Indonesia, antibiotic, antimicrobial, consumption, prescription, dispensing and  
134 stewardship. Full search terms are listed in **Table S1**. We did not contact study authors.

135

136 We included original papers reporting on one or more of the following domains:

- 137 1. Antibiotic consumption: estimates of antibiotic utilization in adults expressed as defined daily  
138 dose (DDD) normalized to 100 patient-days (inpatients) or inhabitant-days (outpatients) (or  
139 with alternative units of measure that could be converted). DDD is defined as the assumed  
140 average maintenance drug dose per day for its main indication in adults as established by the  
141 WHO Collaborating Centre for Drug Statistics and Methodology. For this review, we extracted  
142 data on the top-15 antibiotics with the highest DDDs (defined as the top-3 antibiotics reported  
143 in at least two studies) and grouped them according to the WHO AwaRe (Access, Watch, and  
144 Reserve) classification.<sup>11</sup> We excluded paediatric studies because most studies incorrectly  
145 used DDD (not suitable for children) rather than days of therapy (DOT).
- 146 2. Appropriateness of antibiotic prescribing for treatment or prophylaxis: a) drug prescription  
147 audits using Gyssens method,<sup>12,13</sup> i.e., an expert panel (of at least two reviewers)  
148 retrospectively evaluates each antibiotic prescription (based on available clinical and  
149 microbiological data in the medical record and local guidelines) by sequentially categorizing six



150 indicators: (vi) insufficient data; (v) antibiotic is not indicated; (iv) alternative antibiotic is  
151 available that is (iv-a) more effective, (iv-b) less toxic, (iv-c) less costly, (iv-d) has narrower  
152 spectrum; (iii) inappropriate duration, (iii-a) either too long, (iii-b) or too short; incorrect (ii-a)  
153 dose, (ii-b) interval, (ii-c) route; (i) incorrect timing; and (0) appropriate use; b) studies that  
154 assessed antibiotic prescriptions according to named reference guideline(s), based on the  
155 following eight pre-defined indicators: no contra-indication or allergy label, indication, drug  
156 choice, dose, frequency, duration, route of administration, and overall rational use. We  
157 included in this category relevant indicators collected as part of point prevalence surveys (e.g.,  
158 GLOBAL-PPS, WHO).

159 3. AMS interventions: intervention studies with a clearly described pre-post or (quasi-)  
160 experimental design and outcome measures.

161 4. Knowledge, attitudes and perceptions (KAP): questionnaire-based surveys on knowledge,  
162 attitude and/or practice of antibiotic use among consumers and/or providers.

163

164 We excluded non-human studies; studies exclusively describing other (non-J01) drugs; describing  
165 or comparing the effectiveness, cost, quality and/or molecular profiles of antibiotics; exclusively  
166 targeting particular diagnoses and its treatment; and studies of which the full text could not be  
167 accessed. Because the included studies were mostly neither randomised controlled studies nor  
168 comparative studies, traditional methods for assessment of risk of bias were not applicable. To  
169 ensure quality, we excluded studies that did not report an essential set of STROBE checklist core  
170 items,<sup>14</sup> or did not fulfil additional criteria (**Table S2**). All steps in this systematic literature search  
171 were conducted using Mendeley reference management software. Two reviewers (PD, MA)  
172 separately screened all titles and abstracts, and removed duplicates. Full-text articles were  
173 independently judged for relevance and quality by at least two reviewers (PD, MA, MM, RL). Any  
174 disagreements were resolved by a senior researcher (RLH).

175

## 176 **Data analysis**

177 We extracted and tabulated data on study design, location, population, health care setting, year of  
178 study, study sample size, indicators, interventions, outcome measures and effects, and emerging

179 themes, as appropriate and relevant, based on the author-reported summary estimates (not  
180 individual patient-level data). Data were extracted by two reviewers (PD, MM) onto a predesigned  
181 form.

182

183 Where possible, data on antibiotic consumption and appropriateness of antibiotic prescribing were  
184 pooled using a random-effects model meta-analysis, due to the likeliness of unexplained  
185 heterogeneity.<sup>15</sup> Data on antibiotic consumption were pooled with meta-analyses of rates using the  
186 generic inverse variance method, with DDD/100 patient-days as the rate and sample sizes as the  
187 denominator. Data on the appropriateness of antibiotic prescribing, separate for Gyssens method  
188 and reference guidelines, were pooled with meta-analyses of proportions using the generalised  
189 linear mixed model (GLMM) with the logit transformation to retain studies with extreme  
190 proportions.<sup>16</sup> Heterogeneity was assessed using  $I^2$  statistic (low <25%, moderate 25-49%,  
191 substantial 50-74%, or high 75-100%) and chi-squared test ( $p < 0.10$ ). When two or more studies  
192 involved overlapping populations, data synthesis was prioritised to studies with larger sample  
193 sizes. Subgroup analyses were then performed by dichotomising the studies based on health care  
194 setting (primary care vs hospital [including secondary and tertiary levels]), study location (Java vs  
195 non-Java), year of study (before vs after 2016), AWaRe classification (access vs watch antibiotics)  
196 (for DDD only), and age groups (adults vs children) (for appropriateness only). To assess the  
197 robustness of the findings, we also performed a leave-one-out sensitivity analysis (for DDD and  
198 Gyssens), and by replicating the analysis using other transformations (i.e., Freeman-Tukey double  
199 arcsine, arcsine, inverse-variance logit, log transformations) and without transformation (for  
200 Gyssens only). All meta-analyses were performed in R version 4.1.0 using the additional *meta*  
201 (4.18-2), *metafor* (3.0-2), and *forestplot* packages (1.10.1). When appropriate ( $k \geq 10$ ), publication  
202 bias assessments were performed visually by using funnel plots and quantitatively by using  
203 Egger's tests with a significance level set at 10%. The funnel plots were generated by plotting the  
204 inverse square root of study sizes against the effect estimates due to the expected variability of  
205 study sizes and the fact that conventional funnel plots may be inaccurate in assessing potential  
206 publication bias in meta-analyses of proportions.<sup>17</sup>

207

208 Due to substantial clinical heterogeneity in studies evaluating AMS interventions, we synthesised  
209 the findings using a vote-counting method based on direction of effects, and subsequently  
210 summarised the results into an effect direction table. The interventions were classified as  
211 structural, enabling, persuasive, restrictive, or combined (bundled).<sup>18</sup> Perception surveys were  
212 qualitatively synthesised based on the main emerging themes, stratified by consumers and  
213 providers.

214

#### 215 **Patient and public involvement statement**

216 The patients and public were not involved in the development of this study.

## 217 RESULTS

218

### 219 Study characteristics

220 The search strategy collectively gave 9 323 hits. After title and abstract screening and duplicate  
221 removal, 551 articles remained (**Figure 1**). After full-text screening and quality assessment, 100  
222 reports (covering 97 studies) were included. Study characteristics are summarized in **Tables 1** and  
223 **S3**. Most studies had an observational design (86.0%, 86/100), were conducted in the public  
224 sector (58.4%, 59/101), in hospital settings (53.0%, 53/100), in Java (60.2%, 62/103), and during  
225 the most recent five years (62.0%, 62/100).

226

227 **Table 1.** Characteristics of included reports

| Total reports                             | N          | %    |
|-------------------------------------------|------------|------|
|                                           | <b>100</b> |      |
| <b>Domains</b>                            | <b>107</b> |      |
| Antibiotic consumption                    | 20         | 18.7 |
| Appropriateness of antibiotic prescribing | 49         | 45.8 |
| Gyssens method                            | 18         | 16.8 |
| Reference guidelines                      | 31         | 29.0 |
| Antibiotic stewardship                    | 13         | 12.1 |
| Knowledge, attitude and practice survey   | 25         | 23.4 |
| <b>Study design</b>                       | <b>100</b> |      |
| Observational                             | 86         | 86.0 |
| Pre-post design                           | 13         | 13.0 |
| Randomized control trial                  | 1          | 1.0  |
| <b>Study population</b>                   | <b>108</b> |      |
| Patients                                  | 74         | 68.6 |
| Inpatients                                | 56         | 51.9 |
| Outpatients                               | 18         | 16.7 |
| Community                                 | 20         | 18.5 |
| Healthcare providers                      | 14         | 12.9 |
| <b>Study location</b>                     | <b>103</b> |      |
| Java                                      | 62         | 60.2 |
| Sumatra                                   | 16         | 15.5 |
| Papua and Nusa Tenggara                   | 8          | 7.8  |
| Sulawesi                                  | 7          | 6.8  |
| Kalimantan                                | 6          | 5.8  |
| Bali                                      | 2          | 1.9  |
| National                                  | 2          | 1.9  |
| <b>Year of study</b>                      | <b>100</b> |      |
| 2016-2021                                 | 62         | 62.0 |
| 2011-2015                                 | 29         | 29.0 |
| 2000-2010                                 | 9          | 9.0  |
| <b>Healthcare level</b>                   | <b>100</b> |      |
| Primary                                   | 24         | 24.0 |
| Hospital*                                 | 53         | 53.0 |

| Total reports              | N          | %    |
|----------------------------|------------|------|
| Not applicable (community) | 17         | 17.0 |
| No information provided    | 6          | 6.0  |
| <b>Health care sector</b>  | <b>101</b> |      |
| Public                     | 59         | 58.4 |
| Private                    | 19         | 18.8 |
| Not applicable (community) | 19         | 18.8 |
| No information provided    | 4          | 4.0  |

228 Total N for some characteristics are greater than N=100 because some reports were included in more than category, i.e.  
229 for domain (7 reports), population (8), location (3), and health care sector (1).  
230 \* Hospital included secondary and tertiary levels.  
231

## 232 **Antibiotic consumption**

233 A total of 20 reports (5 193 626 patients) reported data on antibiotic consumption.<sup>19–38</sup> Most of the  
234 studies were conducted in hospital settings (16 reports, 76.2%), in Java (14 reports, 66.7%), and  
235 between 2016-2021 (17 reports, 81.0%; **Table S4**). The pooled estimate of overall antibiotic  
236 consumption was 110.1 DDD/100 patient-days (95% confidence interval [CI] 98.5-121.6;  $I^2=100\%$ ;  
237 **Figure S1**), with ceftriaxone being the most consumed antibiotic (60.2 DDD/100 patient-days  
238 [95%CI 34.2-86.1]), followed by ampicillin (28.0 DDD/100 patient-days [95%CI 0.00-82.8]) and  
239 levofloxacin (21.4 DDD/100 patient-days [95%CI 15.4-27.3]; **Figure 3**). Sensitivity analysis found  
240 that the pooled estimate was not dominated by a single report (**Figure S2**).

241

242 Subgroup analyses (**Figure 3**) showed higher antibiotic consumption in hospitals (134.1 DDD/100  
243 patient-days [95%CI 88.7-179.6]) than primary care (37.8 DDD/100 patient-days [95%CI 25.9-  
244 49.8]), and in recent years (2016-2021: 123.8 DDD/100 patient-days [95%CI 100.2-147.3]) than  
245 previous years (2000-2015: 55.2 DDD/100 patient-days [95%CI 18.5-91.9]), but there were no  
246 significant differences between Java (114 DDD/100 patient-days [95%CI 70.7-158.0]) and outside  
247 of Java (100.0 [95%CI 68.7-131.3]). The asymmetrical funnel plot (Egger's  $p=0.047$ ; **Figure S3**)  
248 may indicate reporting bias or true heterogeneity in antibiotic consumption patterns between  
249 studies, hospitals and/or geographic areas.

250

## 251 **Appropriateness of antibiotic prescribing**

252 A total of 49 reports reported data on the appropriateness of antibiotic prescribing, of which 18<sup>33,39–</sup>  
253 <sup>55</sup> (3167 prescriptions) used Gyssens method and 31 (7826 prescriptions)<sup>20,56–85</sup> used reference

254 guidelines. Most were conducted in hospitals (37 reports, 74.0%), in Java (33 reports, 66.0%), and  
255 in adults (29 reports, 58.0%) (**Table S5-S6**).

256

257 Based on the Gyssens method, the pooled estimate for the appropriateness of antibiotic  
258 prescribing was 35.3% (95%CI 20.7-53.4%;  $I^2=97.2%$ ) (**Figure S4**). confidence analysis showed  
259 that the overall estimate was not dominated by a single study (**Figure S5**) and was similar  
260 between approximation methods (**Figure S6**). The symmetrical funnel plot (Egger's  $p=0.108$ ;  
261 **Figure S7**) indicated low risk of bias from small-study effects. Subgroup analyses showed higher  
262 appropriateness of antibiotic prescribing in adults (43.1% [95%CI 25.9-62.2%]) than in children  
263 (8.4% [95%CI 0.6-57.9%]), but there were no significant differences between primary care 49.4%  
264 [95% CI 23.7-75.4%]) vs hospitals (32.3% [95%CI 17.9-51.0%]), Java (31.4% [95%CI 18.8-  
265 47.6%]) vs outside of Java (38.1% [95%CI 6.2-85.0%]), and recent years (2016-2021: 39.1%  
266 [95%CI 19.4-63.0%]) vs previous years (2000-2015: 26.1% [95%CI 12.4-47.1%]) (**Figure 4A**).

267

268 Based on reference guidelines, most individual indicators of appropriateness scored excellent  
269 (>80%), except for duration (65.8% [95%CI 38.6-85.5%]) (**Figure 4B**) and overall rational antibiotic  
270 use (8.0% [95%CI 1.0-43.6%]). Between-study heterogeneity was substantial (75-100%) for all  
271 indicators, except for administration route ( $I^2=0%$ ,  $p>0.999$ ) and no contraindication/allergy label  
272 ( $I^2=6.4%$ ,  $p=0.382$ ). Possible small-study effects were found for indication and duration (Egger's  
273 test  $p=0.092$  and  $p=0.074$ , respectively). Subgroup analysis showed higher appropriateness of  
274 duration in hospitals (80.0% [95%CI 66.0-89.2%]) than primary care (34.5% [95%CI 4.3-86.1%]),  
275 and in adults (83.2% [95%CI 65.3-92.9%]) than children (17.9% [95%CI 1.2-79.4%]; **Figure S8**),  
276 and higher appropriateness of drug choice, dosing, and overall rational use outside of Java (95.2%  
277 [95%CI 73.9-99.3%], 90.0% [95%CI 71.1-97.1%], and 34.5% [95%CI 3.1-89.8%]) than in Java  
278 (70.0% [95%CI 23.2-94.7%], 67.2% [95%CI 32.3-89.8%), and 3.3% [95%CI 0.3-32.0%]; **Figure**  
279 **S9-S11**, respectively) –although the latter differences were not statistically significant. There were  
280 no significant differences for no contraindication/allergy label, indication, dosing frequency, or  
281 administration route (**Figure S12-15**).

282

## 283 **Antibiotic stewardship interventions**

284 A total of 13 reports reported data on the effect of AMS interventions, of which 11 in  
285 hospitals,<sup>23,28,31,33,47,86–91</sup> 1 in primary care,<sup>92</sup> and 1 in community pharmacies<sup>93</sup> (**Table 2**). Twelve  
286 reports used a pre-post design, and one was a randomized controlled trial. Four reports evaluated  
287 a bundled intervention and 9 studies evaluated single interventions. Enabling interventions were  
288 most common (antibiotic prescribing guidelines or clinical pathway [8 reports], education and  
289 training [5] and pharmacist counselling [1]), followed by persuasive interventions (audit and  
290 performance feedback [3]), restrictive interventions (antibiotic restriction with pre-approval [1]) and  
291 structural interventions (free blood cultures [1], integrated drug management [1]). The most  
292 common reported outcome measures were changes in appropriateness of prescribing (10 reports),  
293 antibiotic consumption (8) and mortality (2), followed by prescribers' scores for knowledge of and  
294 attitude towards antibiotic use, blood culture sampling, hand hygiene compliance, clinical  
295 outcomes, length of hospital stay, and antibiotic compliance (1 each).

296

297 Studies that evaluated bundled interventions (4 reports) reported favourable effects on antibiotic  
298 consumption, prescribing appropriateness, guideline compliance, blood culture sampling, HAI  
299 rates, hand hygiene compliance, and mortality, although the authors of one study concluded that  
300 the multifaceted intervention had limited success, with a very important drawback being the  
301 absence of adequate microbiological diagnostics.<sup>31,88,89,92</sup>

302

303 Studies that evaluated the implementation of antibiotic prescribing guidelines or clinical pathway (7  
304 reports) reported mixed effects on antibiotic consumption and favourable effects on prescribing  
305 appropriateness.<sup>23,31,47,86,88,90,91</sup> Studies that evaluated education and/or training interventions (5  
306 reports) reported mixed effects on antibiotic consumption and prescribing appropriateness.<sup>31,87–89,92</sup>

307

308 The one study that evaluated antibiotic restriction with pre-approval found that consumption of  
309 restricted antibiotics decreased and of unrestricted narrow-spectrum antibiotics increased.<sup>28</sup> The  
310 one randomised study that evaluated the effect of a pharmacist counselling session of outpatient

311 antibiotic users in community pharmacies found that self-reported antibiotic adherence was  
312 significantly higher in the intervention group compared to the control group.<sup>93</sup>



313 **Table 2.** Summary of reports on antimicrobial stewardship interventions

| Author                           | Year of study | Location (city, province)                                    | Health care setting | Study population                                                                                           | Study design                       | Intervention description                                                                                                                                                                                                                                    | Outcome measures                                                                                           | Summary of study findings                                                                                                                                                                                                                                                                                         | Effect direction | Favourability of effect | Comments                                                                                                                                                |
|----------------------------------|---------------|--------------------------------------------------------------|---------------------|------------------------------------------------------------------------------------------------------------|------------------------------------|-------------------------------------------------------------------------------------------------------------------------------------------------------------------------------------------------------------------------------------------------------------|------------------------------------------------------------------------------------------------------------|-------------------------------------------------------------------------------------------------------------------------------------------------------------------------------------------------------------------------------------------------------------------------------------------------------------------|------------------|-------------------------|---------------------------------------------------------------------------------------------------------------------------------------------------------|
| Hadi (2008) <sup>31</sup>        | 2003-2004     | Surabaya (East Java)                                         | Tertiary hospital   | Residents and specialists in the internal medicine department                                              | Pre-post design                    | Combined: comprising guideline development, distribution of a guideline pocketbook, free-of-charge blood cultures, teaching sessions and refresher courses                                                                                                  | Antibiotic consumption                                                                                     | Antibiotic consumption decreased from 99.8 to 73 (-26.9%) DDD/100 patient-days.                                                                                                                                                                                                                                   | ▼                | (+)                     | The multifaceted intervention had limited success, with a very important drawback being the absence of adequate microbiological diagnostics.            |
|                                  |               |                                                              |                     |                                                                                                            |                                    |                                                                                                                                                                                                                                                             | Appropriate antibiotic prescribing (Gyssens)                                                               | Appropriate antibiotic prescribing improved insignificantly from 16% to 25% overall (+9%, 95%CI -6% to 24%). Prescribing without indication insignificantly decreased from 53% to 40% (-13%, 95%CI 4% to -32%).                                                                                                   | ▢                | (+)                     |                                                                                                                                                         |
|                                  |               |                                                              |                     |                                                                                                            |                                    |                                                                                                                                                                                                                                                             | Guideline compliance                                                                                       | Guideline compliance did not change overall (from 87% to 88%), except for a significant increase for sepsis (from 49% to 72%; +23% [95%CI 4-41%]) and dengue fever (from 58% to 88%; +30% [95%CI 12-48%]).                                                                                                        | ◀▶               | (+/-)                   |                                                                                                                                                         |
|                                  |               |                                                              |                     |                                                                                                            |                                    |                                                                                                                                                                                                                                                             | Blood culture sample taken                                                                                 | Taking blood cultures increased from 3% to 81%. However, only 3% of the blood cultures post-intervention were taken before starting antibiotic treatment.                                                                                                                                                         | ▲                | (+/-)                   |                                                                                                                                                         |
|                                  |               |                                                              |                     |                                                                                                            |                                    |                                                                                                                                                                                                                                                             | Mortality within 6 days of admission                                                                       | Mortality in pre-post-period were similar (from 6.6% to 6.2%).                                                                                                                                                                                                                                                    | ◀▶               | (+/-)                   |                                                                                                                                                         |
| Murni (2014) <sup>89</sup>       | 2011-2013     | Yogyakarta (Daerah Istimewa Yogyakarta)                      | Tertiary hospital   | All doctors, nurses, and allied workers in the paediatric wards and PICU                                   | Pre-post design                    | Combined: comprising educational seminars, audit and performance feedback                                                                                                                                                                                   | Primary: Proportion of patients with an HAI                                                                | Proportion of patients with HAI decreased from 22.6% (277/1227 patients) to 8.6% (123/1419 patients) (RR 0.38 [95% CI 0.31 to 0.46]).                                                                                                                                                                             | ▼                | (+)                     | Multifaceted intervention reduced HAI rates, improved rational use of antibiotics, increased hand hygiene compliance, and reduced mortality in children |
|                                  |               |                                                              |                     |                                                                                                            |                                    |                                                                                                                                                                                                                                                             | Secondary: inappropriate antibiotic use (reference guideline), hand hygiene compliance and mortality rates | Inappropriate antibiotic use decreased from 43% to 20.6% (RR 0.46 [95%CI 0.40 to 0.55]).<br>Hand hygiene compliance improved from 18.9% (319/1690) to 62.9% (1125/1789) (RR 3.33 [95%CI 2.99 to 3.70]).<br>In-hospital mortality decreased from 10.4% (127/1227) to 8% (114/1419) (RR 0.78 [95%CI 0.61 to 0.97]). | ▼                | (+)                     |                                                                                                                                                         |
|                                  |               |                                                              |                     |                                                                                                            |                                    |                                                                                                                                                                                                                                                             |                                                                                                            |                                                                                                                                                                                                                                                                                                                   | ▲                | (+)                     |                                                                                                                                                         |
| Hapsari (2006) <sup>88</sup>     | 2003-2004     | Semarang (Central Java)                                      | Tertiary hospital   | Doctors in the paediatric ward                                                                             | Pre-post design                    | Combined: comprising development of antibiotic prescribing guideline, prescriber training, and two rounds of feedback during a 6 months' period                                                                                                             | Antibiotic consumption                                                                                     | Antibiotic consumption decreased from 0.48 to 0.38 DDD/100 patient-days ( $p=0.01$ ).                                                                                                                                                                                                                             | ▼                | (+)                     |                                                                                                                                                         |
|                                  |               |                                                              |                     |                                                                                                            |                                    |                                                                                                                                                                                                                                                             | Appropriate antibiotic prescribing (Gyssens)                                                               | Appropriate antibiotic prescribing improved from 37% to 70.4% ( $p<0.01$ ). Prescribing without indication did not change (from 43% to 42.7%).                                                                                                                                                                    | ▲                | (+)                     |                                                                                                                                                         |
| Dwiprahasto (2004) <sup>92</sup> | 1997-1998     | West Kalimantan, West Sumatra, West Nusa Tenggara, East Java | Primary care        | Doctors, nurses, and paramedics at 118 PHCs and provincial health office staff in 18 districts' warehouses | Pre-post design with control group | Combined: (1) Interactive problem-based pharmacotherapy training; (2) integrated drug management and use for provincial health office staff; followed by (3) self-monitoring of drug use at PHCs post-intervention, and monthly reporting to health office. | Proportion of patients with ARI who received an antibiotic                                                 | Significant decrease from 92.7-93.4% of patients to 64.6-72.4% after 6 months ( $p<0.05$ ) and 35.4-37.4% after 12 months ( $p<0.01$ ) post-intervention, compared to no decline in the control group (89.9-92.2%)                                                                                                | ▼                | (+)                     |                                                                                                                                                         |
|                                  |               |                                                              |                     |                                                                                                            |                                    |                                                                                                                                                                                                                                                             | The use of injection medication (analgesic or antibiotic combined with antihistamine) for myalgia          | Significant decrease from 82.4-89.2% of patients to 76.2-72.5% after 6 months ( $p<0.05$ ) and 32.8-41.2% after 12 months ( $p<0.01$ ) post-intervention, compared to no significant decline in the control group (86.2-87.2%)                                                                                    | ▼                | (+)                     |                                                                                                                                                         |

| Author                           | Year of study | Location (city, province)     | Health care setting | Study population                                            | Study design                | Intervention description                                                                                                              | Outcome measures                                                                                                                                | Summary of study findings                                                                                                                                                                                                                            | Effect direction | Favourability of effect | Comments                                                                                                                                                      |
|----------------------------------|---------------|-------------------------------|---------------------|-------------------------------------------------------------|-----------------------------|---------------------------------------------------------------------------------------------------------------------------------------|-------------------------------------------------------------------------------------------------------------------------------------------------|------------------------------------------------------------------------------------------------------------------------------------------------------------------------------------------------------------------------------------------------------|------------------|-------------------------|---------------------------------------------------------------------------------------------------------------------------------------------------------------|
| King (2015) <sup>90</sup>        | 2015          | Semarang (Central Java)       | Tertiary hospital   | Prescribers In the digestive surgery ward                   | Pre-post design             | Enabling: Implementation of a revised antibiotic prescribing guideline                                                                | Proportion of patients who received an antibiotic                                                                                               | Proportion of patients who received an antibiotic insignificantly decreased from 50% to 40.7% for therapeutic use, and from 32.5% to 29.6% for surgical prophylaxis (overall p-value = 0.410).                                                       | ◁▷               | (+/-)                   |                                                                                                                                                               |
|                                  |               |                               |                     |                                                             |                             |                                                                                                                                       | Antibiotic consumption                                                                                                                          | Antibiotic consumption increased from 35.4 to 51.1 DDD/100 patient-days, mostly ceftriaxone and ciprofloxacin                                                                                                                                        | ▣                | (-)                     |                                                                                                                                                               |
| Rosdiana (2017) <sup>97</sup>    | 2016          | Pekanbaru (Riau)              | Secondary hospital  | Doctors in internal medicine ward                           | Pre-post design             | Enabling: Development and implementation of antibiotic prescribing guideline                                                          | Appropriate antibiotic prescribing (Gyssens)                                                                                                    | Appropriate antibiotic prescribing increased from 33.7% to 48.8% (p=0.020)                                                                                                                                                                           | ▲                | (+)                     |                                                                                                                                                               |
|                                  |               |                               |                     |                                                             |                             |                                                                                                                                       |                                                                                                                                                 | Prescribing without indication decreased from 27.2% to 16.3% (p=0.038).                                                                                                                                                                              | ▼                | (+)                     |                                                                                                                                                               |
| Narulita (2020) <sup>23</sup>    | 2018-2019     | Pamekasan (East Java)         | Secondary hospital  | Prescribers in surgery wards                                | Pre-post design             | Enabling: Implementation of an antibiotic prescribing guideline                                                                       | Antibiotic consumption                                                                                                                          | Antibiotic consumption decreased from 197.3 to 102.4 DDD/100 patient-days (p=0.065)                                                                                                                                                                  | ▽                | (+)                     |                                                                                                                                                               |
| Lizikri (2020) <sup>91</sup>     | 2017-2018     | No city mentioned (West Java) | Secondary hospital  | Pediatricians at pediatric wards                            | Pre-post design             | Enabling: Development and implementation of a pneumonia clinical pathway, with a patient management algorithm                         | Length of hospital stay (days)                                                                                                                  | Proportion of patients discharged <3 days decreased from 51.7% to 31.1% (p=0.065)                                                                                                                                                                    | ▽                | (-)                     | The intervention could not achieve the targeted goals to reduce the length of hospitalization and improve antibiotic prescribing. Consumption almost doubled. |
|                                  |               |                               |                     |                                                             |                             |                                                                                                                                       | Clinical outcomes (recovered, ICU/referred)                                                                                                     | No discernible change in clinical outcomes as nearly all study patients had good clinical outcomes (p=1.00)                                                                                                                                          | ◁▷               | (+/-)                   |                                                                                                                                                               |
|                                  |               |                               |                     |                                                             |                             |                                                                                                                                       | Appropriate antibiotic prescribing (Gyssens)                                                                                                    | Appropriate antibiotic use did not change from 3.3% to 3.3% (p=1.00)                                                                                                                                                                                 | ◁▷               | (+/-)                   |                                                                                                                                                               |
|                                  |               |                               |                     |                                                             |                             | Antibiotic consumption                                                                                                                | Antibiotic consumption increased from 222.4 to 408.4 DDD/100 patient-days (p=0.408)                                                             | ▣                                                                                                                                                                                                                                                    | (-)              |                         |                                                                                                                                                               |
| Widowati (2018) <sup>93</sup>    | 2018          | Denpasar (Bali)               | Community pharmacy  | Pharmacy clients purchasing antibiotics                     | Randomized controlled trial | Enabling: Intervention group: counseling by a pharmacist; Control group: drug information according to the pharmacy service standard. | Antibiotic compliance was measured using the Morisky Medication Adherence Scale-8 questionnaire within 3-5 days after purchasing the medication | The proportion of compliance in the intervention group was 65.3% and the control group was 18.4% (proportion ratio 3.56, 95% CI: 1.90- 6.64).                                                                                                        | ▲                | (+)                     |                                                                                                                                                               |
| Karuniawati (2021) <sup>96</sup> | 2016-2018     | Surakarta (Central Java)      | Secondary hospital  | Hospital-wide prescribers                                   | Pre-post design             | Enabling: Implementation of a hospital antimicrobial stewardship programme for pneumonia inpatients                                   | Antibiotic consumption                                                                                                                          | Antibiotic consumption decreased from 90.8 to 61.4 DDD/100 patient-days                                                                                                                                                                              | ▼                | (+)                     | Shift from predominantly "red" antibiotics (mostly ceftriaxone) to "green" antibiotics (mostly ampicillin sulbactam)                                          |
|                                  |               |                               |                     |                                                             |                             |                                                                                                                                       | Appropriate antibiotic prescribing (Gyssens)                                                                                                    | Appropriate antibiotic prescribing improved from 31.3% to 62.5%                                                                                                                                                                                      | ▲                | (+)                     |                                                                                                                                                               |
|                                  |               |                               |                     |                                                             |                             |                                                                                                                                       | Length of hospital stay (days)                                                                                                                  | Length of stay did not change significantly from 9.9 days to 10.0 days                                                                                                                                                                               | ◁▷               | (+/-)                   |                                                                                                                                                               |
| Farida (2008) <sup>97</sup>      | 2003-2004     | Semarang (Central Java)       | Tertiary hospital   | Doctors in the pediatric ward                               | Pre-post design             | Enabling: Prescriber training on appropriate antibiotic use (two-day training seminar) with feedback after one month                  | Prescribers' scores for knowledge of and attitude towards antibiotic use                                                                        | Scores for knowledge of and attitude significantly increased from 59 to 77.5, and from 56 to 59, respectively.                                                                                                                                       | ▲                | (+)                     |                                                                                                                                                               |
|                                  |               |                               |                     |                                                             |                             |                                                                                                                                       | Appropriate antibiotic prescribing (Gyssens)                                                                                                    | Appropriate antibiotic prescribing improved significantly from 36.3% to 58.2% (p<0.01) overall, except for pneumonia (decreased) and typhoid fever (no change). Prescribing without indication significantly decreased from 42.7% to 23.3% (p<0.05). | ▲                | (+)                     |                                                                                                                                                               |
| Kartika (2019) <sup>93</sup>     | 2018          | Semarang (Central Java)       | Secondary hospital  | Doctors, nurses, and pharmacists in internal medicine wards | Pre-post design             | Enabling: Antimicrobial resistance & stewardship training                                                                             | Antibiotic consumption                                                                                                                          | Antibiotic consumption decreased insignificantly from 103.7 to 99.6 DDD/100 patient-days (p=0.092)                                                                                                                                                   | ▽                | (+)                     |                                                                                                                                                               |

| Author                       | Year of study | Location (city, province) | Health care setting | Study population          | Study design    | Intervention description                                                                                                                                                   | Outcome measures                                                   | Summary of study findings                                                                                                                                                                                                                                                                                    | Effect direction | Favourability of effect | Comments |
|------------------------------|---------------|---------------------------|---------------------|---------------------------|-----------------|----------------------------------------------------------------------------------------------------------------------------------------------------------------------------|--------------------------------------------------------------------|--------------------------------------------------------------------------------------------------------------------------------------------------------------------------------------------------------------------------------------------------------------------------------------------------------------|------------------|-------------------------|----------|
| Susanto (2019) <sup>28</sup> | 2017-2018     | Pekanbaru (Riau)          | Secondary hospital  | Hospital-wide prescribers | Pre-post design | Restrictive: Implementation of a hospital-wide antibiotic restriction programme. Pre-approval was required from the antibiotic stewardship team for third-line antibiotics | Antibiotic consumption for restricted and unrestricted antibiotics | Consumption decreased of restricted antibiotics meropenem (from 3.39 to 2.71; $p=0.04$ ); doripenem (from 0.42 to 0.08; $p=0.003$ ); imipenem (from 0.29 to 0.04; $p=0.02$ ); cefepime (from 1.53 to 0.28; $p=0.001$ ), whereas consumption of amikacin, tigecycline, vancomycin remained unchanged.         | ▼                | (+)                     |          |
|                              |               |                           |                     |                           |                 |                                                                                                                                                                            |                                                                    | Consumption decreased of the unrestricted antibiotics ceftriaxone (from 14.8 to 9.4; $p=0.03$ ) and levofloxacin (from 13.6 to 9.0; $p=0.02$ ). Consumption increased of the narrow-spectrum antibiotics ampicillin/sulbactam (from 1.82 to 3.66; $p=0.003$ ) and cefazoline (from 1.38 to 4.38; $p=0.001$ ) | ◁ ▷              | (+/-)                   |          |

314 The table summarizes 13 reports in the domain antimicrobial stewardship interventions. Findings are synthesized based on direction and favourability of effects. Antibiotic  
 315 consumption is expressed as DDD/100 patient-days.  
 316 Abbreviations: ARI, acute respiratory infection; CI, confidence interval; DDD, defined daily dose; HAI, hospital-associated infection; ICU, intensive care unit; PHCs, primary health care  
 317 centres; PICU, paediatric intensive care unit; RR, relative risk  
 318

### 319 **Knowledge, attitudes, and perceptions on antibiotic use among consumers and providers**

320 A total of 25 reports reported data on KAP, of which 22 among communities<sup>94-115</sup> and 3 among  
321 healthcare providers<sup>116-118</sup> (**Table S7-S8**). Interpretation was challenged by the considerable  
322 between-study clinical (e.g., study populations) and methodological (e.g., survey questionnaires)  
323 heterogeneity.

324

325 First, there was a substantial lack of AMR awareness (10 reports) and knowledge about antibiotics  
326 (16) among community respondents, with wide variations between communities: overall, 23-26%  
327 did not know that antibiotic treated bacterial infections and 58-74% stated that antibiotics can cure  
328 viral infections.<sup>96,105,110,115</sup> Antibiotic knowledge was found to be associated with higher education  
329 and higher income (2 reports).<sup>105,111</sup>

330

331 Second, antibiotic self-medication without prescription was reportedly common community  
332 respondents, ranging from 20-100% across studies (9 reports). Respondents reported they  
333 purchased antibiotics for self-medication at the pharmacy (46-90%),<sup>94-96,99,104,106,109,112</sup> at the kiosk  
334 (20-44%),<sup>96,104</sup> or received them from family and friends (9-12%).<sup>95,109</sup> 20-100% of community  
335 respondents reported that they had ever self-medicated with an antibiotic (11),<sup>94-  
336 96,99,102,104,106,109,112-114</sup> and 87-100% had ever purchased an antibiotic without a prescription  
337 (3).<sup>104,109,112</sup> Higher education and higher income was correlated with better antibiotic use  
338 knowledge.<sup>111</sup> One study found that people without health insurance were more likely to self-  
339 medicate than those with health insurance,<sup>111</sup> whereas another study reported the opposite.<sup>104</sup> The  
340 main reasons for self-medication included positive previous experience (54-82%),<sup>102,104,109,112</sup> self-  
341 medication being practical (61-83%),<sup>94</sup> easy access from the pharmacy (71%),<sup>102</sup> and doctor visit  
342 being expensive (44-72%)<sup>102,109</sup> or unpractical (56%).<sup>96</sup> The main advisors to self-medicate  
343 included health care providers (51-83%),<sup>100,103,104,109</sup> family, relatives or friends (21-45%),<sup>96,102,112</sup>  
344 internet (71%),<sup>115</sup> or reliance on their own knowledge (71%).<sup>96</sup> Antibiotic adherence levels were not  
345 associated with education level or employment status (2 studies).<sup>98,101</sup>

346

347 Third, antibiotic dispensing without prescription was the most important theme reported among  
348 health care providers, with conflicting findings. A survey among 250 community pharmacists in  
349 Yogyakarta (Java), 68% reported that they would dispense antibiotics without prescription,<sup>116</sup>  
350 whereas a survey among 110 health providers in community health centres in Padang (Sumatera)  
351 found that 98.8% did not prescribe antibiotics without a prescription, despite patient request.<sup>117</sup>

352 **DISCUSSION**

353

354 This is the first comprehensive, systematic assessment of human antibiotic use in Indonesia,  
355 including 100 peer-reviewed reports spanning the past 20 years, covering the key domains of  
356 antibiotic consumption, prescribing appropriateness, AMS interventions, and perceptions among  
357 consumers and providers. The rising number of scientific reports published in the most recent  
358 years in Indonesia reflects the increasing momentum of AMR on the national health agenda. The  
359 evidence collected in this Review comes from a range of health care and community settings,  
360 including hospitals, primary care, pharmacies and communities, and includes a range of  
361 interventions targeting different types of health providers and consumers. Nonetheless, the  
362 evidence base is uneven with hospital and urban contexts over-represented, and informal and  
363 formal private health providers, who play a major role in antibiotic distribution, particularly  
364 underrepresented.

365

366 The data included in this Review highlighted several critical evidence gaps. First, there were  
367 important limitations in data heterogeneity and study methodology, and publications were  
368 predominantly from Java Island, which limited our ability to draw firm conclusions on the  
369 contemporary nationwide antibiotic use situation in Indonesia. This is especially relevant given the  
370 substantial within-country variations in access to quality health care.<sup>5</sup> Representative, high-quality  
371 data will be essential for benchmarking between provinces, districts, and healthcare facilities, and  
372 internationally. Second, there is a lack of knowledge of health system drivers of community  
373 antibiotic use, including the effects of the national health insurance rolled-out since 2014,  
374 enforcement of antibiotic regulations in informal and private health sectors, as well as how to  
375 achieve effective community antibiotic stewardship. Antimicrobials are presently widely available  
376 without a prescription, despite existing restrictive policies.<sup>119</sup> Third, the COVID-19 pandemic has  
377 suggested a widespread failure of AMS globally with the potential to worsen the AMR crisis.<sup>4,120</sup>  
378 Data of its impact in the Indonesian context are urgently needed.

379

380 **Antibiotic consumption**

381 Across the included studies, ceftriaxone, levofloxacin (both Watch) and ampicillin (Access) were  
382 found to be the most consumed antibiotics among adults, and consumption (expressed as DDD)  
383 was higher in hospitals than in primary care, and in recent years (2016-2021) than previous years  
384 (2000-2015), but there were no significant differences between geographic settings. According to  
385 national pharmaceutical sales data, antibiotic consumption increased 2.5-fold between 2000 and  
386 2015, largely driven by the major classes broad-spectrum penicillins (2.6-fold), fluoroquinolones  
387 (7.1-fold), and cephalosporins (5.1-fold).<sup>121</sup> In 2015, the antibiotic consumption rate per capita in  
388 Indonesia (3022 DDDs per 1000 inhabitants per year) fell in the same range as, for instance,  
389 China (3060) and Philippines (2600), but was still lower than, for instance, Vietnam (11 480),  
390 Thailand (6682) and Malaysia (4388).<sup>121</sup> About 69% of antibiotic consumption in Indonesia were  
391 Access antibiotics, 30% Watch, and <1% Reserve –this is still above the WHO target of 60%  
392 Access antibiotics in total consumption.<sup>3</sup>

393

394 These trends reflect both better access to antibiotics for those who need them, as well as  
395 increases in inappropriate antibiotic use. The findings are consistent with the widespread use of  
396 broad-spectrum antibiotics, predominantly third-generation cephalosporins and fluoroquinolones,  
397 as reported in other Asian countries<sup>122–126</sup> and globally,<sup>127,128</sup> and with the disproportionate increase  
398 in Watch antibiotic consumption observed in LMIC (165% compared with 27.9% in high-income  
399 countries between 2000-2015).<sup>129</sup> Although antibiotic consumption per capita in Indonesia and  
400 many other LMIC is currently still lower than in most high-income countries in Europe and North  
401 America, rapid increases are leading to converging consumption rates, especially regarding last-  
402 resort compounds.<sup>3</sup> Barring policy changes, antibiotic consumption is projected to increase  
403 worldwide by 200% between 2015 and 2030.<sup>3</sup> The above concerning developments highlight  
404 significant challenges for AMS, underscoring the urgent need for regulation of antibiotic use in  
405 Indonesia, and other LMIC.

406

#### 407 **Appropriateness of prescribing**

408 In Indonesia, appropriateness of antibiotic prescribing was found to be poor overall (35.3%),  
409 49.4% in primary care versus 33.5% in hospitals, 45.9% in adults versus 8.4% in children. We did

410 not identify clear trends over time (prior vs after 2016) or space (Java vs outside of Java). This  
411 was despite nationwide implementation of hospital AMS programmes during the past five years.<sup>7</sup>  
412 Studies in primary healthcare settings in other countries have also reported considerable rates of  
413 inappropriate antibiotic use, for instance, at 15% in Canada,<sup>130</sup> 55% in South Africa,<sup>131</sup> 61% in  
414 China,<sup>132</sup> 88% in Pakistan,<sup>133</sup> and 90% in Vietnam,<sup>134</sup> and, likewise, a systematic review of nine  
415 studies in LMIC reporting a wide range of between 8 to 100%.<sup>135</sup> In a global point prevalence  
416 survey, guideline compliance of antimicrobial drug choice in hospitals in Latin America, Africa and  
417 Asia, was estimated to be lower than 70% for each region.<sup>127</sup>

418

419 Inappropriate prescribing of antibiotics has been attributed to a range of complex factors, with  
420 variations across settings and countries, including physicians' nonadherence to antibiotic  
421 guidelines, lack of knowledge and training regarding antibiotics, lack of diagnostic facilities or,  
422 where available, lack of utilization and quality, uncertainty over the diagnosis or fear of clinical  
423 failure, pressure from pharmaceutical industry, financial benefits for physicians, and pressure from  
424 patients to prescribe antibiotics regardless of the indication, coupled with lack of time of physicians  
425 to educate patients.<sup>136,137</sup> Around 60% of total health care spending in Indonesia is in the private  
426 sector, where financial incentives may promote prescribing practices that deviate from guidelines.  
427 The scale and consequences of non-prescription and private sector antibiotic consumption in  
428 Indonesia are an urgent priority for further study and action. Additionally, the local implementation  
429 of global definitions and universally applicable quality indicators for antibiotic prescribing in  
430 inpatient and outpatient settings will be essential to identify targets for AMS interventions and  
431 measure their effectiveness.<sup>138,139</sup> Standardized point prevalence survey tools to assess antibiotic  
432 use in hospitals have proven to be useful for identifying targets for improvement and evaluating the  
433 effect of interventions.<sup>127,128</sup>

434

### 435 **Antimicrobial stewardship**

436 According to WHO, AMS is considered one of three pillars of an integrated approach to health  
437 systems strengthening and reports from high-income settings have shown that AMS can optimise  
438 the use of antimicrobials, improve patient outcomes, reduce AMR and health-care-associated



439 infections, and save health-care costs amongst others.<sup>18,140</sup> A global systematic review and meta-  
440 analysis of 26 studies, reported that implementation of AMS programmes resulted in a reduction in  
441 overall antibiotic consumption of 19.1% (US 19.9, Europe 20.9%, Asia 16%), of restricted  
442 antibiotics by 26.6%, reduction in drug resistant infections, with no associated adverse outcomes  
443 in terms of mortality and infection rates.<sup>141</sup>

444

445 In Indonesia, AMS programmes are typically in an early stage of implementation,<sup>142,143</sup> with many  
446 hospitals lacking the basic infrastructure to adequately measure process, outcome and structural  
447 indicators, e.g., access to microbiology services, hospital antibiotic guidelines, AMS staff training  
448 and education, human resources (including infectious disease specialist or clinical microbiologist),  
449 and ICT support.<sup>144,145</sup> Whereas to date government policy has focused on assessing hospital  
450 antibiotic use as an AMS outcome indicator (using DDD and Gyssens method),<sup>145</sup> a recently  
451 launched national guideline incorporated additional outcome measures, such as cost-  
452 effectiveness, mortality, and AMR rates.<sup>146</sup>

453

454 The few AMS intervention studies conducted to date reported clear benefits from implementing  
455 bundled interventions combining antibiotic prescribing guidelines, trainings, review and feedback,  
456 restriction with pre-approval, among others. These findings demonstrate that AMS interventions  
457 are feasible in the local context and that there is considerable potential for reducing antibiotic  
458 consumption, particularly of restricted antibiotics, improving prescribing appropriateness, and  
459 reducing prescriptions without indication. However, the interventions evaluated to date were  
460 mostly single-centre and short-term (<1 year), and data are lacking about the sustained benefits of  
461 AMS programmes in the Indonesian context.

462

463 Previous evidence has shown that given the varying priorities and contextual issues in LMIC, such  
464 as health system processes, patient demands, varying cultures of care, availability of universal  
465 access to quality antimicrobials, laboratory infrastructure and surveillance systems, multipronged  
466 interventions combining different restrictive and enabling strategies are most likely to be  
467 effective.<sup>147,148</sup> Indeed, the available Indonesian data confirm that a stand-alone guideline

468 distribution approach, without implementing additional AMS core elements, may not work.<sup>149</sup>  
469 Further enhancement of post-prescription review and feedback efforts holds potential to decrease  
470 antibiotic consumption and antibiotic duration.<sup>150</sup> For pre-prescription approval, local data  
471 suggested that the decreased use of last-resort antibiotics might cause a “squeezing the balloon”  
472 phenomenon –the increased use of non-restricted antibiotics due to restrictions of the restricted  
473 antibiotics.<sup>151</sup>

474

#### 475 **Perceptions on antibiotic use**

476 Key themes identified from perception surveys were a substantial lack of AMR awareness and  
477 knowledge about antibiotics, particularly among the poor and lower educated, and widespread  
478 antibiotic self-medication without prescription among the general population, and over-the-counter  
479 non-prescription antibiotic dispensing in community pharmacies but not in community health  
480 centres –although representative data are lacking to quantify this problem and its drivers. The  
481 available data corroborate findings of a global review of 38 studies from 24 countries in community  
482 pharmacies that over-the-counter non-prescription antibiotics comprised 62% of all dispensed  
483 antibiotics, most commonly for urinary tract and upper respiratory tract infections.<sup>152</sup> A review of 19  
484 studies in Southeast Asia reported a prevalence of self-medication with antibiotics ranging from  
485 7.3 to 85.6% (median 42.6%), highest among men, health students and professionals, with the  
486 most common illnesses or symptoms being common cold, sore throat, fever, gastrointestinal tract  
487 and respiratory diseases.<sup>153</sup> Across the included studies, the main reasons for self-medication  
488 included positive previous experience, easy access from the pharmacy, doctor visit being  
489 expensive or unpractical, and the main advisors to self-medicate included health care providers,  
490 family, relatives or friends, internet or reliance on their own knowledge, which largely concurred  
491 with findings in other Southeast Asian countries.<sup>153</sup> A mixed-method study in Indonesia found that  
492 drug dispensers were driven to sell non-prescription antibiotic due to strong patient demand,  
493 informal drug sellers dispensing medicines, competition between different types of drug outlets,  
494 drug outlet owners pushing their staff to sell medicines, and weak enforcement of regulations.<sup>119</sup>

495

#### 496 **Country progress in the National Action Plan on AMR and suggested priorities**

497 The National Action Plan on AMR has driven efforts to strengthen microbiological laboratory  
498 capacity and data information systems to enable national surveillance,<sup>154</sup> supported by the  
499 government and international funding agencies. Indonesia enrolled in the WHO Global  
500 Antimicrobial Resistance and Use Surveillance System (GLASS) and submitted first batches of  
501 AMR and antibiotic consumption data in 2020.<sup>155</sup> In 2021, the Ministry of Health launched new  
502 guidelines for antibiotic prescribing and stewardship,<sup>146,156</sup> which have also adopted the AWaRe  
503 classification. Despite this progress, however, the National Action Plan for AMR has not yet  
504 generated the required sustainable capacity to contain AMR. Enhanced coordination and financial  
505 support at the country, province and district levels are needed, to prevent that the response to  
506 AMR remains uneven and insufficient. Interventions to optimise antimicrobial use need to be  
507 based on a health systems approach, beyond AMS only, informed by a broad research base. This  
508 includes addressing the wider drivers of antibiotic use –such as inequitable burdens of ill health  
509 and fractured care cascades. Optimization of antimicrobial use, on the basis of robust surveillance  
510 data, should be a priority of the national agenda for universal health coverage. Both universal  
511 health coverage and AMR require strong human-centered care with accessible health care  
512 facilities, medicines and diagnostics, with a focus on quality and equity.<sup>5,157,158</sup> This requires further  
513 investments in health care infrastructure, training of health workers, community participation and  
514 increased health literacy. Modifiable factors related to the patient (e.g., awareness, knowledge)  
515 and the health system (e.g., strict policies, medicine quality, financial incentives, infrastructure  
516 gaps) need to be further identified and addressed when designing context-specific interventions  
517 aimed at curtailing inappropriate antibiotic use.

518 **CONCLUSION**

519

520 Critical evidence gaps exist on antibiotic use in Indonesia regarding informal and formal private  
521 health care providers, geographic areas outside of Java Island, as well as effective AMS models  
522 that consider country-specific socio-cultural, economic and political circumstances. Optimisation of  
523 antimicrobial use as a means to tackle AMR should be a priority of the national agenda for  
524 universal health coverage. In this respect, the COVID-19 pandemic has taught important lessons  
525 on the importance of infectious diseases and the critical need to build resilient health systems.

526 **Acknowledgements:** EXPLAIN study group: Erni J. Nelwan, Ralalicia Limato, Manzilina Mudia,  
527 Helio Guterres, Enty Enty, Ifael Y. Mauleti, Maria Mayasari, Iman Firmansyah, May Hizrani, Anis  
528 Karuniawati, Prof Taralan Tambunan, Prof Amin Soebandrio, Decy Subekti, Iqbal Elyazar, Mutia  
529 Rahardjani, Fitria Wulandari, Prof Reinout van Crevel, Rogier van Doorn, Vu Thi Lan Huong, Nga  
530 Do Ti Thuy, Sonia Lewycka, Prof Alex Broom, Raph L. Hamers.

531 **Funding statement** This work was funded by and RLH and HRVD are supported by the Wellcome  
532 Africa Asia Programme Vietnam (106680/Z/14/Z). RL is supported by an OUCRU Prize  
533 Studentship and a Nuffield Dept of Medicine Tropical Network Fund DPhil Bursary.

534 **Competing interest statement** AK serves as the current Chair of the National AMR Committee  
535 (KPRA). HRVD serves as an Executive Board Member of The Surveillance and Epidemiology of  
536 Drug-resistant Infections Consortium (SEDRIC). The other authors declare no competing interests.

537 **Author contributions** RLH conceived the idea for the study. RLH and RL obtained the funding.  
538 RL, PD and RLH designed the study protocol and data extraction instrument. PD, GL, MM, and  
539 MA collected and verified the data, overseen by RL and RLH. RL, GL and RLH performed the  
540 analysis and had full access to all study data. RL, GL, MA and RLH drafted the paper, with critical  
541 inputs from AK and HRvD. All authors critically revised the manuscript, and all authors gave  
542 approval for the final version to be published.

543 **Data sharing statement:** No additional data are available.

544 **ORCID IDs:**

545 Ralalicia Limato 0000-0002-5306-3254

546 Gilbert Lazarus 0000-0002-3605-6167

547 Puck Dernison -

548 Manzilina Mudia -

549 Monik Alamanda -

550 Erni J. Nelwan 0000-0003-4064-5412

551 Robert Sinto 0000-0003-3857-300X

552 Anis Karuniawati 0000-0002-9882-2488

553 H. Rogier van Doorn 0000-0002-9807-1821

554 Raph L. Hamers 0000-0002-5007-7896

## 555 REFERENCES

- 556 1 Christopher J L Murray, Kevin Shunji Ikuta, Fablina Sharara, Lucien Swetschinski, Gisela  
557 Robles Aguilar, Authia Gray, Chieh Han, Catherine Bisignano, Puja Rao, Eve Wool, Sarah  
558 C Johnson, Annie J Browne, Michael Give Chipeta, Frederick Fell, Sean Hackett, MN.  
559 Global burden of bacterial antimicrobial resistance in 2019: a systematic analysis. *Lancet*  
560 2022; **399**: 629–55.
- 561 2 Aditi Sriram, Erta Kalanxhi, Geetanjali Kapoor, Jessica Craig, Ruchita Balasubramanian,  
562 Sehr Brar, Nicola Criscuolo, Alisa Hamilton, Eili Klein, Katie Tseng, Thomas Van Boeckel  
563 RL. The State of the World's Antibiotics 2021. 2021.
- 564 3 Klein EY, Van Boeckel TP, Martinez EM, *et al.* Global increase and geographic  
565 convergence in antibiotic consumption between 2000 and 2015. *Proc Natl Acad Sci U S A*  
566 2018; **115**: E3463–70.
- 567 4 Langford BJ, So M, Raybardhan S, *et al.* Antibiotic prescribing in patients with COVID-19:  
568 rapid review and meta-analysis. *Clin Microbiol Infect* 2021; **27**: 520–31.
- 569 5 Agustina R, Dartanto T, Sitompul R, *et al.* Universal health coverage in Indonesia: concept,  
570 progress, and challenges. *Lancet*. 2019; **393**: 75–102.
- 571 6 Mboi N, Murty Surbakti I, Trihandini I, *et al.* On the road to universal health care in  
572 Indonesia, 1990–2016: a systematic analysis for the Global Burden of Disease Study 2016.  
573 *Lancet* 2018; **392**: 581–91.
- 574 7 Parathon H, Kuntaman K, Widiastoety TH, *et al.* Progress towards antimicrobial resistance  
575 containment and control in Indonesia. *BMJ* 2017; : j3808.
- 576 8 Ministry of Health Republic of Indonesia. National Action Plan on Antimicrobial Resistance  
577 Indonesia 2017-2019. 2017 [https://www.flemingfund.org/wp-](https://www.flemingfund.org/wp-content/uploads/59f148b0482cda160087e29b9a5a21a0.pdf)  
578 [content/uploads/59f148b0482cda160087e29b9a5a21a0.pdf](https://www.flemingfund.org/wp-content/uploads/59f148b0482cda160087e29b9a5a21a0.pdf).
- 579 9 Menteri Koordinator Bidang Pembangunan Manusia dan Kebudayaan Republik Indonesia.  
580 Peraturan Menteri Koordinator Bidang Pembangunan Manusia dan Kebudayaan Republik  
581 Indonesia Nomor 7 Tahun 2021 Tentang Rencana Aksi Nasional Pengendalian Resistensi  
582 Antimikroba Tahun 2020-2024. 2021. [https://jdih.kemenkopmk.go.id/sites/default/files/2021-](https://jdih.kemenkopmk.go.id/sites/default/files/2021-11/Permenko%207%202021%20RAN%20PRA.pdf)  
583 [11/Permenko 7 2021 RAN PRA.pdf](https://jdih.kemenkopmk.go.id/sites/default/files/2021-11/Permenko%207%202021%20RAN%20PRA.pdf) (accessed Feb 14, 2022).

- 584 10 Page MJ, McKenzie JE, Bossuyt PM, *et al.* The PRISMA 2020 statement: An updated  
585 guideline for reporting systematic reviews. *BMJ* 2021; **372**. DOI:10.1136/bmj.n71.
- 586 11 World Health Organization (WHO). WHO releases the 2019 AWaRe Classification  
587 Antibiotics. World Heal. Organ. 2019. [https://www.who.int/news/item/01-10-2019-who-](https://www.who.int/news/item/01-10-2019-who-releases-the-2019-aware-classification-antibiotics)  
588 [releases-the-2019-aware-classification-antibiotics](https://www.who.int/news/item/01-10-2019-who-releases-the-2019-aware-classification-antibiotics) (accessed March 15, 2021).
- 589 12 Gyssens IC, Van Den Broek PJ, Kullberg BJ, Hekster YA, Van Der Meer JWM. Optimizing  
590 antimicrobial therapy. A method for antimicrobial drug use evaluation. *J Antimicrob*  
591 *Chemother* 1992; **30**: 724–7.
- 592 13 Van Der Meer JWM, Gyssens IC. Quality of antimicrobial drug prescription in hospital. *Clin*  
593 *Microbiol Infect* 2001; **7**: 12–5.
- 594 14 von Elm E, Altman DG, Egger M, Pocock SJ, Gøtzsche PC, Vandenbroucke JP. The  
595 Strengthening the Reporting of Observational Studies in Epidemiology (STROBE)  
596 statement: guidelines for reporting observational studies. *Lancet* 2007; **370**: 1453–7.
- 597 15 Barker TH, Migliavaca CB, Stein C, *et al.* Conducting proportional meta-analysis in different  
598 types of systematic reviews: a guide for synthesisers of evidence. *BMC Med. Res.*  
599 *Methodol.* 2021; **21**: 1–9.
- 600 16 Schwarzer G, Chemaitelly H, Abu-Raddad LJ, Rücker G. Seriously misleading results using  
601 inverse of Freeman-Tukey double arcsine transformation in meta-analysis of single  
602 proportions. *Res Synth Methods* 2019; **10**: 476–83.
- 603 17 Hunter JP, Saratzis A, Sutton AJ, Boucher RH, Sayers RD, Bown MJ. In meta-analyses of  
604 proportion studies, funnel plots were found to be an inaccurate method of assessing  
605 publication bias. *J Clin Epidemiol* 2014; **67**: 897–903.
- 606 18 Davey P, Scott CL, Brown E, *et al.* Interventions to improve antibiotic prescribing practices  
607 for hospital inpatients (updated protocol). *Cochrane Database Syst Rev* 2017.  
608 DOI:10.1002/14651858.CD011236.pub2.
- 609 19 Andriani Y, Meirista I, Aprio Y. Evaluasi Penggunaan Antibiotik dengan Metode ATC/DDD  
610 dan DU 90% di Puskesmas Kebun Handil Kota Jambi Periode 2018 dan 2019. *J Healthc*  
611 *Technol Med* 2020; **6**: 700.
- 612 20 Dirga D, Khairunnisa SM, Akhmad AD, Setyawan IA, Pratama A. Evaluasi Penggunaan

- 613 Antibiotik pada Pasien Rawat Inap di Bangsal Penyakit Dalam RSUD. Dr. H. Abdul Moeloek  
614 Provinsi Lampung. *J Kefarmasian Indones* 2021; : 65–75.
- 615 21 Mahmudah F, Sumiwi SA, Hartini S. Study of the Use of Antibiotics with ATC/DDD System  
616 and DU 90% in Digestive Surgery in Hospital in Bandung. *Indones J Clin Pharm* 2016; **5**:  
617 293–8.
- 618 22 Massey FK, Yulia R, Herawati F. Profil Kualitas dan Kuantitas Penggunaan Antibiotik  
619 Profilaksis pada Pre, On, dan Pos Bedah di Rumah Sakit Provinsi (RSP) NTB. *J Sains*  
620 *Farm Klin* 2021; **8**: 43.
- 621 23 Narulita L, Bilal R, Akram M, Suharjo S. Analysis of Antibiotics on Patients Surgery,  
622 before and after Used Guidelines for Antibiotics (PPAB). *J Pharmascience* 2020; **7**: 51.
- 623 24 Perdaka W, Sagita D, Pratama S. Studi Penggunaan Antibiotik Berdasarkan ATC / DDD  
624 Dan Du 90 % Di Puskesmas X Kota Jambi Periode 2017-2018 Study of Antibiotic Use  
625 Based on ATC / DDD and Du 90 % in Community Health Centers X City OfJambi Period  
626 2017-2018. *J Healthc Technol Med* 2020; **6**: 26–32.
- 627 25 Pratama NYI, Suprpti B, Ardhiansyah AO, Shinta DW. Analisis Penggunaan Antibiotik  
628 pada Pasien Rawat Inap Bedah dengan Menggunakan Defined Daily Dose dan Drug  
629 Utilization 90% di Rumah Sakit Universitas Airlangga. *Indones J Clin Pharm* 2019; **8**: 256.
- 630 26 Rachmawati S, Fazeri RL, Norcahyanti I. Gambaran Penggunaan Antibiotik di Bangsal  
631 Penyakit Dalam RSUD Bangil Kabupaten Pasuruan. *JPSCR J Pharm Sci Clin Res* 2020;  
632 **01**: 12–21.
- 633 27 Sholih MG, Sudarjat H, Saula LS. Gambaran penggunaan antibiotik berdasarkan metode  
634 ATC/DDD dan DU 90% di salah satu Puskesmas Karawang. *Heal Sci Growth* 2019; : 31–7.
- 635 28 Susanto M, Qanti PO, Anggraini D, Enda WG. Decline in Antibiotic Use after  
636 Implementation of Restriction Program at Eka Hospital, Pekanbaru, Riau. In: The 5th  
637 International Conference on Public Health. 2019: 1–7.
- 638 29 Trisia FJ, Sagita D, Pratama S, *et al.* Evaluasi Penggunaan Antibiotik Dengan Metode ATC  
639 / DDD Dan DU 90 % Di Dua Puskesmas Kota Jambi Periode 2017-2018 Evaluation Of  
640 Antibiotic Use By Method ATC / DDD And DU 90 % In Two Health Centers Jambi Period  
641 2017-2018. *J Healthc Technol Med* 2020; **6**: 125–38.



- 642 30 Wikantiananda T, Tjahjadi AI, Sudjud RW. Antibiotic Utilization Pattern in the Intensive Care  
643 Unit of Tertiary Hospital in West Java, Indonesia. *Int J Integr Heal Sci* 2019; **7**: 81–7.
- 644 31 Hadi U, Keuter M, ... HVA. Optimizing antibiotic usage in adults admitted with fever by a  
645 multifaceted intervention in an Indonesian governmental hospital. *Trop Med Int Heal* 2008.  
646 <https://onlinelibrary.wiley.com/doi/abs/10.1111/j.1365-3156.2008.02080.x> (accessed May  
647 10, 2019).
- 648 32 Herawati F, Yulia R, Hak E, *et al.* A Retrospective Surveillance of the Antibiotics  
649 Prophylactic Use of Surgical Procedures in Private Hospitals in Indonesia. *Hosp Pharm*  
650 2019; **54**: 323–9.
- 651 33 Kartika N, Lestari E, Farida H, Ciptaningtyas VR. Kualitas dan Kuantitas Penggunaan  
652 Antibiotik pada Kasus Penyakit Dalam Sebelum dan Setelah Penyuluhan PPRA Di Rumah  
653 Sakit Nasional Diponegoro. *Diponegoro Med J (Jurnal Kedokt Diponegoro)* 2019; **8**: 1306–  
654 18.
- 655 34 Kusuma A, Galistiani G, Wijayanti D. Evaluasi Kuantitatif Penggunaan Antibiotik pada  
656 Pasien Caesarean Section di RSUD se-Kabupaten Banyumas. *J Farm Indones* 2016; **8**.  
657 <http://www.jfionline.org/index.php/jurnal/article/view/245> (accessed May 8, 2019).
- 658 35 Putri Hadiningrat Ayunda, Akrom A, Risdiana I. Analisis penggunaan antibiotik pada pasien  
659 Community-Acquired Pneumonia (CAP) di RS PKU Muhammadiyah Gamping. 2021  
660 DOI:10.31603/PHARMACY.V7I1.3251.
- 661 36 Yulia R, Yuaraningtyas G, Wijono H. Profil penggunaan antibiotik dan peta kuman di ruang  
662 rawat RS Husada Utama Surabaya. 2017. <http://repository.ubaya.ac.id/31867/> (accessed  
663 May 7, 2019).
- 664 37 Pradipta IS, Ronasih E, Kartikawati AD, *et al.* Three years of antibacterial consumption in  
665 Indonesian Community Health Centers: The application of anatomical therapeutic  
666 chemical/defined daily doses and drug utilization 90% method to monitor antibacterial use. *J*  
667 *Fam Community Med* 2015; **22**: 101.
- 668 38 Muliani N, Herawati F, Yulia R, Wijono H. Quantity and quality profiles of antibiotics pre, on,  
669 and post surgery in a hospital setting. *Int J Clin Pharm* 2021. DOI:10.1007/s11096-021-  
670 01251-0.

- 671 39 Adani NL, Arkhaesi N, Anam M. Hubungan usia anak dan diagnosis dengan rasionalitas  
672 penggunaan antibiotik pada pasien anak di Puskesmas Rowosari Semarang. *J Kedokt*  
673 *Diponegoro* 2015; **4**: 1277–85.
- 674 40 Magdalena R, Bachtiar A. Antimicrobial Resistance Control Program on The Rational Use  
675 of Antibiotics In Eka Hospital Pekanbaru, Indonesia. *publications.inschool.id* 2018.  
676 <http://publications.inschool.id/index.php/icash/article/view/258> (accessed May 9, 2019).
- 677 41 Yoanitha N, Wirakusumah F, Sukarsa R. Gambaran Rasionalitas Penggunaan Antibiotik  
678 berdasarkan Kriteria Gyssens di Bangsal Obstetri dan Ginekologi RSUP Dr. Hasan Sadikin  
679 Bandung. *obgynia.com* 2018.  
680 <http://www.obgynia.com/obgyn/index.php/obgynia/article/view/37> (accessed May 9, 2019).
- 681 42 Setiawan S, Widyati W, Harijono P. Profil Penggunaan Antibiotik Pascapencanangan  
682 Penerapan Program Pengendalian Resistensi Antibiotik di Intensive Care Unit Rumah Sakit  
683 TNI-AL dr. Ramelan. *J Farm Klin Indones* 2018; **7**: 30–7.
- 684 43 Purwaningsih AEDA, Rahmawati F, Wahyono D. Evaluasi Penggunaan Antibiotik Pada  
685 Pasien Pediatri Di Bangsal Rawat Inap Rumah Sakit Islam Sultan Agung Semarang. 2015.  
686 [http://etd.repository.ugm.ac.id/index.php?act=view&buku\\_id=83867&mod=penelitian\\_detail](http://etd.repository.ugm.ac.id/index.php?act=view&buku_id=83867&mod=penelitian_detail)  
687 [&sub=PenelitianDetail&typ=html](http://etd.repository.ugm.ac.id/index.php?act=view&buku_id=83867&mod=penelitian_detail&sub=PenelitianDetail&typ=html) (accessed May 9, 2019).
- 688 44 Muthoharoh A, Iana ND, Rahmatullah S, Wirasti W. Evaluasi kualitatif penggunaan  
689 antibiotika profilaksis di instalasi bedah sentral secara retrospektif. 2019  
690 <http://repository.urecol.org/index.php/proceeding/article/view/386> (accessed May 8, 2019).
- 691 45 Hanifah H, Sari I, Nuryastuti T. Evaluasi Penggunaan Antibiotik Empiris dan Analisis Biaya  
692 Demam Tifoid di Sebuah RS Swasta Kota Semarang. *jsfk.ffarmasi.unand.ac.id* 2018; **5**: 1–  
693 6.
- 694 46 Inez A, Susanti Program Studi Farmasi R, Kedokteran Universtas Tanjungpura JI Profesor  
695 Dokter Hadari Nawawi FH, *et al.* Evaluasi Rasionalitas Penggunaan Antibiotik pada Pasien  
696 Anak Rawat Inap di Rumah Sakit Universitas Tanjungpura Periode Januari-Juni 2018  
697 Evaluation of Antibiotic Rationality for Pediatric Inpatient at Hospital of Tanjungpura  
698 University Period. 2019 <https://jurnal.untan.ac.id/index.php/jmfarmasi/article/view/37615>  
699 (accessed Feb 7, 2021).

- 700 47 Rosdiana D, Anggraini D, Balmas M, Effendi D, Bet A. Peningkatan Rasionalitas  
701 Penggunaan Antibiotik Pasca Implementasi Kebijakan Penggunaan Antimikroba di RSUD  
702 Arifin Achmad Pekanbaru. *J Kedokt Brawijaya* 2018; **30**: 36–40.
- 703 48 Aljufri AQ, Yasin NM, Wahyono D. Rasionalitas Terapi Antibiotik Empiris Pada Pasien  
704 Pneumonia di Instalasi Rawat Inap RSUP Dr. Kariadi Semarang. *Maj Farm* 2021; **17**: 89.
- 705 49 Anggraini ENF, Wicaksono A, Armyanti I. Rasionalitas Penggunaan Antibiotik pada Kasus  
706 Typhus Abdominalis di Puskesmas Siantan Hilir Kota Pontianak Tahun 2014. *J Mhs PSPD*  
707 *FK Univ Tanjungpura* 2018; **2**. <http://jurnal.untan.ac.id/index.php/jfk/article/view/23543>  
708 (accessed May 8, 2019).
- 709 50 Hardiana I, Ratih Laksmiawati D, Utami Ramadaniati H, *et al.* Evaluasi penggunaan  
710 antibiotika pada pasien pneumonia komunitas di instalasi rawat inap RSPAD Gatot Subroto.  
711 *Orig Artic MFF* 2021; **25**: 1–6.
- 712 51 Waridiarto DS, Agus Priambodo, Endang Sri Lestari. Kualitas penggunaan antibiotik pada  
713 kasus bedah orthopedi di bangsal bedah RSUP Dr. Kariadi. *Media Med Muda* 2015; **4**:  
714 618–25.
- 715 52 Maakh DT, Da A, Fraga SS, Firdaus A. Rationality Evaluation of The Use of Prophylactic  
716 Antibiotics In Sectio Caesarea Patients In Hospitals. Mgr. Gabriel Manek, Svd Atambua in  
717 2018. Universitas Citra Bangsa, 2019 <http://www.cyber->  
718 [chmk.net/ojs/index.php/farmasi/article/view/641](http://www.cyber-chmk.net/ojs/index.php/farmasi/article/view/641) (accessed Feb 4, 2021).
- 719 53 Ibrahim AM, Widyati W, Prasetyadi FOH. Analisis Kualitatif Penggunaan Antibiotik pada  
720 Pasien Rujukan dengan Metode Analisis Alur Gyssen di RSPAL Dr. Ramelan Surabaya.  
721 *MPI (Media Pharm Indones* 2020; **3**: 88.
- 722 54 Sumiwi SA. Quality of Antibiotics Use in Patients with Digestive Surgery in Hospital in  
723 Bandung City. *Indones J Clin Pharm* 2014; **3**: 135–40.
- 724 55 Sutrisno E, Humardewayanti R, Bayupurnama P. Impact of irrational antibiotic therapy to  
725 hospital cost of care of pneumonia in patients in Dr. Sardjito Hospital. *Acta Interna J Intern*  
726 *Med* 2013; **3**: 67–71.
- 727 56 Harartasyahrani RA, Simamora S. Evaluasi penggunaan antibiotik profilaksis pada pasien  
728 bedah kategori highly recommended di rumah sakit “X” kota Prabumulih. *J Muara Sains*,

- 729            *Tekno Kedokt dan Ilmu Kesehat* 2021; **5**: 121.
- 730    57    Ovikariani S, Saptawat T, Rahma FA. Evaluasi Rasionalitas Penggunaan Antibiotik Pada  
731            Pasien Ispa Di. *J Ilmu Keperawatan dan Kebidanan STIKES Telogorejo* 2019; **XI**: 76–82.
- 732    58    Ofisya M, Laviesta, Susanti R, Purwanti NU. Evaluasi penggunaan antibiotik pada pasien  
733            pneumonia rawat inap di RSUD dr. Soedarso Pontianak. 2020  
734            <https://jurnal.untan.ac.id/index.php/jmfarmasi/article/view/42256> (accessed Feb 7, 2021).
- 735    59    Grassella, Yuswar MA, Purwanti NU. Studi rasionalitas penggunaan antibiotik dan interaksi  
736            obat pada pasien anak terdiagnosis Infeksi Saluran Pernapasan Akut (ISPA) di instalasi  
737            rawat jalan RSUD Sultan Syarif Mohamad Alkadrie Pontianak tahun 2018. *J Mhs Farm Fak*  
738            *Kedokt UNTAN* 2019; **4**. <https://jurnal.untan.ac.id/index.php/jmfarmasi/article/view/35316>  
739            (accessed Feb 7, 2021).
- 740    60    Hasyul SFP, Puspitan T, Nuari DA, Muntaqin EP, Wartini E, Eka MY. Evaluasi penggunaan  
741            obat antibiotik pada pasien demam tifoid di Kabupaten Garut pada Januari-Desember 2017.  
742            *J Ilm Farm Bahari* 2019; **10**: 160–70.
- 743    61    Jamiati J, Abadi H, Sari M. Evaluasi Peresepan Antibiotik Pada Pasien Rawat Jalan di  
744            Puskesmas Dabun Gelang Kabupaten Gayo Lues. *J Dunia Farm* 2019; **3**: 115–22.
- 745    62    Fakhrunnisa F, Andrajadi R, Radji M. Quality of Antibiotic Prescribing for Respiratory Tract  
746            Disease in Primary Healthcare Centers in the District of Tegal, Central Java, Indonesia.  
747            *Indones J Clin Pharm* 2020; **9**: 95.
- 748    63    Anggraini AB, Syachroni. Penggunaan Antibiotik Profilaksis pada Bedah Bersih di Rumah  
749            Sakit di Jakarta. *J Penelit dan Pengemb Pelayanan Kesehat* 2020; **4**: 7–12.
- 750    64    Dewi R, Sutrisno D, Medina F, *et al.* Evaluasi Penggunaan Antibiotik Infeksi Saluran  
751            Pernapasan Atas pada Anak di Puskesmas Olak Kemang Kota Jambi Tahun 2018  
752            Evaluation of Antibiotic Use for Upper Respiratory Tract Infections in Children in Olak  
753            Kemang Public Health Center, Jambi in 2018. 2020  
754            DOI:10.30595/PHARMACY.V17I1.6936.
- 755    65    Dewi R, Sutrisno D, Purnamasari R. Evaluasi Penggunaan Antibiotik pada Pasien Balita  
756            dengan Diagnosa Infeksi Saluran Pernapasan Atas di Puskesmas Koni Kota Jambi. *J Sains*  
757            *Kes* 2020 2020; **2**: 385–90.

- 758 66 Kaparang PC, Tjitrosantoso H, Yamlean PV. Evaluasi kerasionalan penggunaan antibiotika  
759 pada pengobatan pneumonia anak di instalasi rawat inap RSUP Prof. Dr. R. D. Kandou  
760 manado periode Januari-Desember 2013. *PHARMACON* 2014; **3**.  
761 <https://ejournal.unsrat.ac.id/index.php/pharmacon/article/view/5440> (accessed May 13,  
762 2019).
- 763 67 Herlina D, Hasina R, Dewi NMAR. Pola persepsian antibiotik pada pasien infeksi saluran  
764 kemih di instalasi rawat jalan RSUD Provinsi NTB tahun 2017. *Sasambo J Pharm* 2021; **2**:  
765 11–5.
- 766 68 Zazuli Z, Sukandar EY, Lisni I. Evaluasi Penggunaan Obat pada Pasien Bedah di Suatu  
767 Rumah Sakit Swasta di Bandung. *J Farm Klin Indones* 2015; **4**: 87–97.
- 768 69 Islam Z, Qodariyah SM, Nursehah ENE. Penggunaan Antibiotik Pada Terapi Community  
769 Acquired Pneumonia di RSUD Pasar Rebo dan RSUD Tarakan di Jakarta Tahun 2014. *J*  
770 *Sains dan Teknol Farm* 2017; **19**: 1–8.
- 771 70 Dania H, Baroroh F, Bachri MS. Evaluasi Penggunaan Antibiotik Pada Pasien Bedah Sesar  
772 Di Rumah Sakit PKU Muhammadiyah Bantul Yogyakarta. *Pharm J Farm Indones* 2016; **13**.  
773 [https://www.neliti.com/id/publications/161113/evaluasi-penggunaan-antibiotik-pada-pasien-](https://www.neliti.com/id/publications/161113/evaluasi-penggunaan-antibiotik-pada-pasien-bedah-sesar-di-rumah-sakit-pku-muhamm)  
774 [bedah-sesar-di-rumah-sakit-pku-muhamm](https://www.neliti.com/id/publications/161113/evaluasi-penggunaan-antibiotik-pada-pasien-bedah-sesar-di-rumah-sakit-pku-muhamm) (accessed May 10, 2019).
- 775 71 Nyoman SMH N, Sumarsono T, Wahidatun N. Study on Use of Antibiotics for the Treatment  
776 of Acute Respiratory Infections (ARIs) in Children at a Clinic in Bandung, Indonesia. *Res J*  
777 *Pharm Biol Chem Sci* 2017; **8**: 158.
- 778 72 Andrajati R, Tilaqza A, Supardi S. Factors related to rational antibiotic prescriptions in  
779 community health centers in Depok City, Indonesia. *J Infect Public Health* 2016; **10**: 41–8.
- 780 73 Dewi RS, Radji M, Andalusia R. Evaluation of Antibiotic Use Among Sepsis Patients in an  
781 Intensive Care Unit: A cross-sectional study at a referral hospital in Indonesia. *Sultan*  
782 *Qaboos Univ Med J [SQUMJ]* 2018; **18**: 367.
- 783 74 Bakhtiar, Makaba S, Hasmi, Mallongi A. Rationality of Antibiotic Drug Used to Medical  
784 Patient Post-Operatively in Selebe Solu Hospital Sorong City Papua Barat Province 2018.  
785 *Int J Sci Healthc Res* 2019; **4**.  
786 [http://ijshr.com/IJSHR\\_Vol.4\\_Issue.1\\_Jan2019/IJSHR0022.pdf](http://ijshr.com/IJSHR_Vol.4_Issue.1_Jan2019/IJSHR0022.pdf) (accessed May 9, 2019).

- 787 75 Sugiarti T, Sidemen A, Wiratmo. Studi Penggunaan Antibiotik pada Pasien Penyakit ISPA  
788 Usia Bawah Lima Tahun di Instalasi Rawat Jalan Puskesmas Sumber Sari Periode 1  
789 Januari-31 Maret 2014. *jurnal.unej.ac.id* 2015.  
790 <https://jurnal.unej.ac.id/index.php/JPK/article/view/2583> (accessed May 9, 2019).
- 791 76 Rusdiana N, Safitri M, Resti A. Evaluasi penggunaan antibiotika profilaksis pada pasien  
792 bedah sesar terencana di rumah sakit ibu dan anak “x” di Tangerang. *Soc Clin Pharm*  
793 *Indones J* 2016. <http://journal.uta45jakarta.ac.id/index.php/SCPIJ/article/view/275>  
794 (accessed May 9, 2019).
- 795 77 Oktaviani F, Wahyono D, Yuniarti E. Evaluasi penggunaan antibiotik profilaksis terhadap  
796 kejadian infeksi luka operasi pada operasi sectio caesarea. *J Manaj DAN PELAYANAN*  
797 *Farm (Journal Manag Pharm Pract* 2015. <https://journal.ugm.ac.id/jmpf/article/view/29449>  
798 (accessed May 7, 2019).
- 799 78 Kurniawati H, Auliyannah A. Pattern of antibiotics use in adult patients with Urinary Tract  
800 Infection (UTI). 2021 DOI:10.20527/JBK.V1711.10244.
- 801 79 Bestari MP, Karuniawati H. Evaluasi Rasionalitas dan Efektifitas Penggunaan Antibiotik  
802 pada Pasien Pneumonia Pediatrik di Instalasi Rawat Inap Rumah Sakit Pusat Jawa  
803 Tengah. *Pharmacon J Farm Indones* 2019; **14**. DOI:10.23917/pharmacon.v14i2.6524.
- 804 80 Limato R, Nelwan EJ, Mudia M, *et al*. A multicentre point prevalence survey of patterns and  
805 quality of antibiotic prescribing in Indonesian hospitals. *JAC-Antimicrobial Resist* 2021; : 1–  
806 10.
- 807 81 Ridha Elvina, Nur Rahmi, Sandra Ayu Oktavira. Evaluasi penggunaan antibiotik pada  
808 pasien Community-Acquired Pneumonia (CAP) di instalasi rawat inap rumah sakit ‘X’  
809 Jakarta. *Pharmacy* 2017; **14**: 64–74.
- 810 82 Risha Fillah Fithria, Akroman Rohmat Di’fain. Rasionalitas terapi antibiotik pada pasien  
811 diare akut anak usia 1-4 tahun di rumah sakit Banyumanik Semarang tahun 2013.  
812 *Pharmacy* 2015; **12**: 197–209.
- 813 83 Nawakasari N, Nugraheni AY. Evaluasi Penggunaan Antibiotik pada Pasien Infeksi Saluran  
814 Kemih di Instalasi Rawat Inap RSUP X di Klaten Tahun 2017. *Pharmacon J Farm Indones*  
815 2019; **16**: 38–48.

- 816 84 Octavia DR. Evaluasi Penggunaan Antibiotika Profilaksis pada Pasien Bedah Sesar.  
817 *Indones J Heal Res* 2019; **2**: 23–30.
- 818 85 Benua GP, Tiwow GAR, Untu SD, Karauwan FA. Evaluasi Rasionalitas Penggunaan  
819 Antibiotik Pada Pasien ISPA Di Puskesmas Tonusu Kecamatan Pamona Puselemba  
820 Kabupaten Poso. *J Biofarmasetikal Trop* 2019; **2019**: 136–40.
- 821 86 Karuniawati H, Yulianti T, Aini DK, Nurwienda FI. Impact of antimicrobial stewardship  
822 program on the use of antibiotics in pneumonia patients at teaching hospital in surakarta  
823 Indonesia. *Int J Appl Pharm* 2021; **13**: 20–3.
- 824 87 Farida H, Herawati H, Hapsari M, Notoatmodjo H, Hardian H. Penggunaan Antibiotik  
825 Secara Bijak Untuk Mengurangi Resistensi Antibiotik, Studi Intervensi di Bagian Kesehatan  
826 Anak RS Dr. Kariadi. *Sari Pediatr* 2016; **10**: 34.
- 827 88 Hapsari M, Farida H, Keuter M, PJ B, Pediatri UH-S, 2016 U. Penurunan Penggunaan  
828 Antibiotik pada Pasien Anak dengan Demam. *Sari Pediatr* 2006.  
829 <https://saripediatri.org/index.php/sari-pediatri/article/download/816/751> (accessed May 7,  
830 2019).
- 831 89 Murni IK, Duke T, Kinney S, Daley AJ, Soenarto Y. Reducing hospital-acquired infections  
832 and improving the rational use of antibiotics in a developing country: an effectiveness study.  
833 *Arch Dis Child* 2015; **100**: 454–9.
- 834 90 King J, Ciptaningtyas VR. Kuantitas penggunaan antibiotik sebelum dan setelah pembuatan  
835 Pedoman Penggunaan Antibiotik (PPAB). Penelitian pada kasus bedah digestif RSUP Dr.  
836 Kariadi Semarang. *J Kedokt Diponegoro* 2015; **4**: 1072–82.
- 837 91 Lizikri A, Arozal W, Ramadaniati HU. Effects of Clinical Pathway Implementation in  
838 Management of Pediatric Inpatients with Pneumonia: A Cross-Sectional Study in Indonesia.  
839 *Int J Res Pharm Sci* 2020; **11**: 7281–8.
- 840 92 Dwiprahasto I. Ketersediaan obat di kabupaten dan mutu persepan di pusat pelayanan  
841 kesehatan primer. *Berkala Ilmu Kedokteran* 2004. [http://i-  
842 lib.ugm.ac.id/jurnal/detail.php?dataId=3283](http://i-lib.ugm.ac.id/jurnal/detail.php?dataId=3283) (accessed May 9, 2019).
- 843 93 Widowati I, Wirawan I, Nopiyan N, Sari K. Pharmacist counseling intervention to improve  
844 patient antibiotic compliance. *phpmajournal.org* 2018.



- 845 <https://phpmajournal.org/index.php/phpma/article/view/158> (accessed May 9, 2019).
- 846 94 Artini I, Indrayani A. Penggunaan antibiotika secara mandiri pada mahasiswa kedokteran  
847 dan non kedokteran Universitas Udayana. *ojs.unud.ac.id* 2016.  
848 <https://ojs.unud.ac.id/index.php/ach/article/view/27464> (accessed May 9, 2019).
- 849 95 Djawaria DAP, Setiadi AP, Setiawan E. Analisis Perilaku dan Faktor Penyebab Perilaku  
850 Penggunaan Antibiotik Tanpa Resep di Surabaya Behavior Behavior Analysis and  
851 Attributed Factors to Non Prescription Antibiotic Used in Surabaya. *J MKMI* 2018; **14**.  
852 DOI:10.30597/mkmi.v14i4.5080.
- 853 96 Kurniawan K, Posangi J, Rampengan N. Association between public knowledge regarding  
854 antibiotics and self-medication with antibiotics in Teling Atas Community Health Center,  
855 East Indonesia. *Med J Indones* 2017; **26**: 62.
- 856 97 Novelni R, Azyenela L, Septiana Y. Hubungan tingkat pendidikan masyarakat terhadap  
857 pengetahuan dalam penggunaan antibiotik oral di apotek Kecamatan Koto Tengah Padang.  
858 *J Penelit Farm Indones* 2020; **9**: 2020.
- 859 98 Nuraini A, Yulia R, Herawati F, Setiasih S. The Relation between Knowledge and Belief with  
860 Adult Patient's Antibiotics Use Adherence. *J Manaj DAN PELAYANAN Farm (Journal*  
861 *Manag Pharm Pract* 2019; **8**: 165.
- 862 99 Pratama AN, Rohmawati A, Rachmawati E. A survey of antibiotics purchased without  
863 prescription among non-health science students in Jember, Indonesia. *J Farm Sains dan*  
864 *Komunitas* 2018. <https://e-journal.usd.ac.id/index.php/JFSK/article/view/1032> (accessed  
865 May 9, 2019).
- 866 100 Salsabila NN, Kristina SA. Awareness on antibiotic resistance among lay people in  
867 Yogyakarta, Indonesia. *Int Jounral Pharm Res* 2021; **12**: 180–8.
- 868 101 Siahaan S, Usia T, Pujiati S, *et al*. Pengetahuan, sikap, dan perilaku masyarakat dalam  
869 memilih obat yang aman di tiga Provinsi di Indonesia. *neliti.com* 2017.  
870 [https://www.neliti.com/publications/178574/pengetahuan-sikap-dan-perilaku-masyarakat-](https://www.neliti.com/publications/178574/pengetahuan-sikap-dan-perilaku-masyarakat-dalam-memilih-obat-yang-aman-di-tiga-p)  
871 [dalam-memilih-obat-yang-aman-di-tiga-p](https://www.neliti.com/publications/178574/pengetahuan-sikap-dan-perilaku-masyarakat-dalam-memilih-obat-yang-aman-di-tiga-p) (accessed May 7, 2019).
- 872 102 Tandjung H, Wiyono WI, Mpila DA. Pengetahuan dan penggunaan antibiotik secara  
873 swamedikasi pada masyarakat di kota Manado. 2021 DOI:10.35799/PHA.10.2021.34044.



- 874 103 WHO. Antibiotic Resistance: Multi-Country Public Awareness Survey. *WHO Press* 2015; :  
875 1–51.
- 876 104 Widayati A, Suryawati S, de Crespigny C, Hiller JE. Self medication with antibiotics in  
877 Yogyakarta City Indonesia: a cross sectional population-based survey. *BMC Res Notes*  
878 2011; **4**: 491.
- 879 105 Widayati A, Suryawati S, de Crespigny C, Hiller JE. Knowledge and beliefs about antibiotics  
880 among people in Yogyakarta City Indonesia: a cross sectional population-based survey.  
881 *Antimicrob Resist Infect Control* 2012; **1**: 38.
- 882 106 Fatmah S, Aini SR, Pratama IS. Tingkat Pengetahuan Mahasiswa Tahun Pertama Bersama  
883 (TPB) tentang Penggunaan Antibiotik dalam Swamedikasi. *J Sains Farm Klin* 2019; **6**: 200.
- 884 107 Yulia R, Putri R, Wahyudi R. Studi Tingkat Pengetahuan Masyarakat terhadap Penggunaan  
885 Antibiotik di Puskesmas Rasimah Ahmad Bukittinggi. *J Pharm Sci* 2019; **2**: 43–8.
- 886 108 Yuliani NN, Wijaya C, Moeda G. Tingkat pengetahuan masyarakat RW IV Kelurahan  
887 Fontein Kota Kupang terhadap penggunaan antibiotik. 2014  
888 [https://media.neliti.com/media/publications/259672-tingkat-pengetahuan-masyarakat-rwiv-](https://media.neliti.com/media/publications/259672-tingkat-pengetahuan-masyarakat-rwiv-kelu-a98691f1.pdf)  
889 [kelu-a98691f1.pdf](https://media.neliti.com/media/publications/259672-tingkat-pengetahuan-masyarakat-rwiv-kelu-a98691f1.pdf) (accessed May 10, 2019).
- 890 109 Fernandez ABM. Studi Penggunaan Antibiotik Tanpa Resep Di Kabupaten Manggarai dan  
891 Manggarai Barat – NTT. 2013; **2**: 1–17.
- 892 110 Fimanggara B, Istriati, Diposarosa R. Knowledge and Attitude towards Antibiotic Use  
893 among College Students in Jatinangor. *journal.fk.unpad.ac.id* 2016.  
894 <http://journal.fk.unpad.ac.id/index.php/amj/article/view/792> (accessed May 9, 2019).
- 895 111 Fitriah R, Mardiaty N, Tinggi S, *et al*. Pengaruh faktor sosiodemografi terhadap pengetahuan  
896 dan sikap pada penggunaan antibiotik di kalangan masyarakat pedesaan: Studi  
897 observasional di kecamatan Cempaka Banjarbaru. 2021  
898 DOI:10.31603/PHARMACY.V7I1.3181.
- 899 112 Hamid F, Rasmin Kotto F, Prasetya W. Karakteristik Pengguna Antibiotik tanpa Resep  
900 Dokter di Kalangan Guru Kecamatan Labakkang, Kabupaten Pangkajene dan Kepulauan.  
901 2020 DOI:10.24252/ALAMI.V4I2.15157.
- 902 113 Insany AN, Dika P. Destiani, Anwar Sani, Lilik Sabdaningtyas, Ivan S. Pradipta. Association

- 903 between Perceived Value and Self-Medication with Antibiotics: An Observational Study  
904 Based on Health Belief Model Theory. *J Farm Klin Indones* 2015; **4**: 77–86.
- 905 114 Kondo IV, Lolo WA, Jayanto I. Pengaruh Tingkat Pengetahuan Dan Sikap Terhadap  
906 Penggunaan Antibiotik Di Apotek Kimia Farma 396 Tuminting Kota Manado. *Pharmacon*  
907 2020; **9**.
- 908 115 Kristina SA, Wati R, Prasetyo SD, Fortwengel G. Public knowledge and awareness towards  
909 antibiotics use in Yogyakarta: A cross sectional survey. *Pharm Sci Asia* 2020.  
910 DOI:10.29090/psa.2020.02.019.0008.
- 911 116 Asvinigita LRM, Ikapuspitasari, Kristina SA. Antibiotics stewardship practice among  
912 community pharmacists in indonesia: A cross-sectional survey. *Int J Pharm Res* 2019; **11**:  
913 176–81.
- 914 117 Siswati S. Analisis penggunaan antibiotika yang tidak rasional pada balita penderita bukan  
915 pneumonia di kota Padang. Lembaga Penelitian, Universitas Negeri Padang, 2009  
916 <http://ejournal.unp.ac.id/index.php/sainstek/article/view/153> (accessed May 8, 2019).
- 917 118 Zhang J, Cameron D, Quak SH, *et al*. Rates and determinants of antibiotics and probiotics  
918 prescription to children in Asia-Pacific countries. *Benef Microbes* 2020; **11**: 329–38.
- 919 119 Wulandari LPL, Khan M, Liverani M, *et al*. Prevalence and determinants of inappropriate  
920 antibiotic dispensing at private drug retail outlets in urban and rural areas of Indonesia: A  
921 mixed methods study. *BMJ Glob Heal* 2021; **6**: 1–11.
- 922 120 Arshad M, Mahmood SF, Khan M, Hasan R. Covid -19, misinformation, and antimicrobial  
923 resistance. *BMJ* 2020; **371**: 1–2.
- 924 121 CDDEP. Resistance Map: Indonesia Use Data. 2021.  
925 <https://resistancemap.cddep.org/CountryPage.php?countryId=77&country=Indonesia+>  
926 (accessed May 31, 2021).
- 927 122 Thamlikitkul V, Rattanaumpawan P, Sirijatuphat R, Wangchinda W. Integrated one-day  
928 surveillance of antimicrobial use, antimicrobial consumption, antimicrobial resistance,  
929 healthcare-associated infection, and antimicrobial resistance burden among hospitalized  
930 patients in Thailand. *J Infect* 2020; **81**: 98–106.
- 931 123 Singh SK, Sengupta S, Antony R, *et al*. Variations in antibiotic use across India: multi-centre

- 932 study through Global Point Prevalence survey. *J Hosp Infect* 2019; **103**: 280–3.
- 933 124 Saleem Z, Hassali MA, Versporten A, *et al.* A multicenter point prevalence survey of  
934 antibiotic use in Punjab, Pakistan: findings and implications. *Expert Rev Anti Infect Ther*  
935 2019; **17**: 285–93.
- 936 125 Xie D shuang, Xiang L li, Li R, Hu Q, Luo Q qin, Xiong W. A multicenter point-prevalence  
937 survey of antibiotic use in 13 Chinese hospitals. *J Infect Public Health* 2015; **8**: 55–61.
- 938 126 Thu TA, Rahman M, Coffin S, Harun-Or-Rashid M, Sakamoto J, Hung NV. Antibiotic use in  
939 Vietnamese hospitals: A multicenter point-prevalence study. *Am J Infect Control* 2012; **40**:  
940 840–4.
- 941 127 Versporten A, Zarb P, Caniaux I, *et al.* Antimicrobial consumption and resistance in adult  
942 hospital inpatients in 53 countries: results of an internet-based global point prevalence  
943 survey. *Lancet Glob Heal* 2018; **6**: e619–29.
- 944 128 Saleem Z, Hassali MA, Godman B, *et al.* Point prevalence surveys of antimicrobial use: a  
945 systematic review and the implications. *Expert Rev Anti Infect Ther* 2020; **18**: 897–910.
- 946 129 Klein EY, Milkowska-Shibata M, Tseng KK, *et al.* Assessment of WHO antibiotic  
947 consumption and access targets in 76 countries, 2000–15: an analysis of pharmaceutical  
948 sales data. *Lancet Infect Dis* 2021; **21**: 107–15.
- 949 130 Schwartz KL, Langford BJ, Daneman N, *et al.* Unnecessary antibiotic prescribing in a  
950 Canadian primary care setting: a descriptive analysis using routinely collected electronic  
951 medical record data. *C Open* 2020; **8**: E360–9.
- 952 131 Gasson J, Blockman M, Willems B. Antibiotic prescribing practice and adherence to  
953 guidelines in primary care in the cape town Metro district, South Africa. *South African Med J*  
954 2018; **108**: 304–10.
- 955 132 Wang J, Wang P, Wang X, Zheng Y, Xiao Y. Use and prescription of antibiotics in primary  
956 health care settings in China. *JAMA Intern Med* 2014; **174**: 1914–20.
- 957 133 Sarwar MR, Saqib A, Iftikhar S, Sadiq T. Antimicrobial use by WHO methodology at primary  
958 health care centers: a cross sectional study in Punjab, Pakistan. *BMC Infect Dis* 2018; **18**:  
959 1–9.
- 960 134 Minh NNQ, van Toi P, Qui LM, *et al.* Antibiotic use and prescription and its effects on

- 961 Enterobacteriaceae in the gut in children with mild respiratory infections in Ho Chi Minh City,  
962 Vietnam. A prospective observational outpatient study. *PLoS One* 2020; **15**: 1–18.
- 963 135 Sulis G, Adam P, Nafade V, *et al.* Antibiotic prescription practices in primary care in low-  
964 And middle-income countries: A systematic review and meta-analysis. *PLoS Med* 2020; **17**:  
965 1–20.
- 966 136 Chaw PS, Höpner J, Mikolajczyk R. The knowledge, attitude and practice of health  
967 practitioners towards antibiotic prescribing and resistance in developing countries—A  
968 systematic review. *J Clin Pharm Ther* 2018; **43**: 606–13.
- 969 137 Md Rezal RS, Hassali MA, Alrasheedy AA, Saleem F, Md Yusof FA, Godman B.  
970 Physicians' knowledge, perceptions and behaviour towards antibiotic prescribing: a  
971 systematic review of the literature. *Expert Rev Anti Infect Ther* 2015; **13**: 665–80.
- 972 138 Monnier AA, Eisenstein BI, Hulscher ME, Gyssens IC. Towards a global definition of  
973 responsible antibiotic use: Results of an international multidisciplinary consensus  
974 procedure. *J Antimicrob Chemother* 2018; **73**: vi3–16.
- 975 139 Le Maréchal M, Tebano G, Monnier AA, *et al.* Quality indicators assessing antibiotic use in  
976 the outpatient setting: A systematic review followed by an international multidisciplinary  
977 consensus procedure. *J Antimicrob Chemother* 2018; **73**: vi40–9.
- 978 140 Schuts EC, Hulscher MEJL, Mouton JW, *et al.* Current evidence on hospital antimicrobial  
979 stewardship objectives: A systematic review and meta-analysis. *Lancet Infect Dis* 2016; **16**:  
980 847–56.
- 981 141 Karanika S, Paudel S, Grigoras C, Kalbasi A, Mylonakis E. Systematic review and meta-  
982 analysis of clinical and economic outcomes from the implementation of hospital-based  
983 antimicrobial stewardship programs. *Antimicrob Agents Chemother* 2016; **60**: 4840–52.
- 984 142 Hospital Accreditation Committee. Standard Hospital Accreditation 1st Edition. 2017.
- 985 143 Herawati F, Ananta SC, Parwitha IAA, *et al.* Interview-based cross-sectional needs  
986 assessment to advance the implementation of an effective antibiotic stewardship program in  
987 Indonesian hospitals. *Heal Policy OPEN* 2020; **1**: 100002.
- 988 144 Lee TH, Lye DC, Chung DR, *et al.* Antimicrobial stewardship capacity and manpower needs  
989 in the Asia Pacific. *J Glob Antimicrob Resist* 2021; **24**: 387–94.

- 990 145 Ministry of Health Republic of Indonesia. Peraturan Menteri Kesehatan Republik Indonesia  
991 Nomor 8 Tahun 2015 Tentang Program Pengendalian Resistensi Antimikroba di Rumah  
992 Sakit. Indonesia, 2015.
- 993 146 Direktorat Pelayanan Kesehatan Rujukan DJPKKKRI. Panduan Penatagunaan Antimikroba  
994 di Rumah Sakit Edisi 1. 2021.
- 995 147 Wilkinson A, Ebata A, Macgregor H. Interventions to Reduce Antibiotic Prescribing in  
996 LMICs: A Scoping Review of Evidence from Human and Animal Health Systems. *Antibiot*  
997 *(Basel, Switzerland)* 2018; **8**. DOI:10.3390/ANTIBIOTICS8010002.
- 998 148 Van Katwyk SR, Grimshaw JM, Nkangu M, *et al*. Government policy interventions to reduce  
999 human antimicrobial use: A systematic review and evidence map. *PLOS Med* 2019; **16**:  
1000 e1002819.
- 1001 149 US Department of Health and Human Services, CDC. Core elements of hospital antibiotic  
1002 stewardship programs. *US Dep Heal Hum Serv CDC* 2019; : 40.
- 1003 150 Dijck C Van, Vlieghe E, Janneke &, Cox A. Systematic reviews Antibiotic stewardship  
1004 interventions in hospitals in low-and middle-income countries: a systematic review. *Bull*  
1005 *World Heal Organ* 2018; **96**: 266–80.
- 1006 151 Burke JP. Antibiotic Resistance — Squeezing the Balloon? *Jama* 1998; **280**: 1270–1.
- 1007 152 Auta A, Hadi MA, Oga E, *et al*. Global access to antibiotics without prescription in  
1008 community pharmacies: A systematic review and meta-analysis. *J Infect* 2019; **78**: 8–18.
- 1009 153 Nepal G, Bhatta S. Self-medication with Antibiotics in WHO Southeast Asian Region: A  
1010 Systematic Review. *Cureus* 2018; **10**: e2428.
- 1011 154 Chua AQ, Verma M, Hsu LY, Legido-Quigley H. An analysis of national action plans on  
1012 antimicrobial resistance in Southeast Asia using a governance framework approach. *Lancet*  
1013 *Reg Heal - West Pacific* 2021; **7**: 100084.
- 1014 155 WHO. Global antimicrobial resistance and use surveillance system (GLASS) report.  
1015 Geneva, 2021 [http://www.who.int/glass/resources/publications/early-implementation-report-](http://www.who.int/glass/resources/publications/early-implementation-report-2020/en/)  
1016 [2020/en/](http://www.who.int/glass/resources/publications/early-implementation-report-2020/en/).
- 1017 156 Ministry of Health Republic of Indonesia. Peraturan Menteri Kesehatan Republik Indonesia  
1018 Nomor 28 Tahun 2021 Tentang Pedoman Penggunaan Antibiotik. 2021.

1019 157 Bloom G, Merrett GB, Wilkinson A, Lin V, Paulin S. Antimicrobial resistance and universal  
1020 health coverage. *BMJ Glob Heal* 2017; **2**: e000518.  
1021 158 ReAct - Action on Antibiotic Resistance. Antimicrobial resistance and universal health  
1022 coverage What's the deal? 2019 [https://www.reactgroup.org/wp-](https://www.reactgroup.org/wp-content/uploads/2019/09/Antimicrobial-resistance-and-universal-health-coverage-Whats-the-deal-ReAct-Sept-2019.pdf)  
1023 [content/uploads/2019/09/Antimicrobial-resistance-and-universal-health-coverage-Whats-](https://www.reactgroup.org/wp-content/uploads/2019/09/Antimicrobial-resistance-and-universal-health-coverage-Whats-the-deal-ReAct-Sept-2019.pdf)  
1024 [the-deal-ReAct-Sept-2019.pdf](https://www.reactgroup.org/wp-content/uploads/2019/09/Antimicrobial-resistance-and-universal-health-coverage-Whats-the-deal-ReAct-Sept-2019.pdf) (accessed Dec 26, 2021).  
1025

1026 **FIGURE LEGEND**

1027

1028

1029 **Figure 1.** PRISMA flowchart of study selection

1030

1031

1032

1033 **Figure 2.** Geographical map of the 100 included reports on antibiotic use in Indonesia 2000-2021

1034

1035 The map includes 2 KAP surveys that were conducted nationwide, and 1 AMS study and 1 KAP  
1036 survey that were conducted in multiple provinces.

1037

1038

1039

1040 **Figure 3.** Summary forest plot of reports on antibiotic consumption

1041

1042 The figure summarizes 20 reports in the domain antibiotic consumption, expressed as DDD/100  
1043 patient-days, for the top-15 antibiotics. Egger's tests to assess publication bias could only be  
1044 performed for the primary analysis and the individual AWARe antibiotics.

1045

1046 Abbreviations: CI, confidence interval; DDD, defined daily dose; NA, not applicable.

1047

1048

1049

1050 **Figure 4.** Summary forest plot on prescribing appropriateness

1051

1052 The figure summarizes 49 reports in the domain prescribing appropriateness based on Gyssens  
1053 method (A) or references guidelines (B). Indicators (B) were reported by different numbers of  
1054 studies. Egger's tests to assess publication bias in Gyssens method (A) could only be performed  
1055 for the primary analysis.

1056

1057 Abbreviations: CI, confidence interval; NA, not applicable.

Figure 1. PRISMA flowchart of study selection.

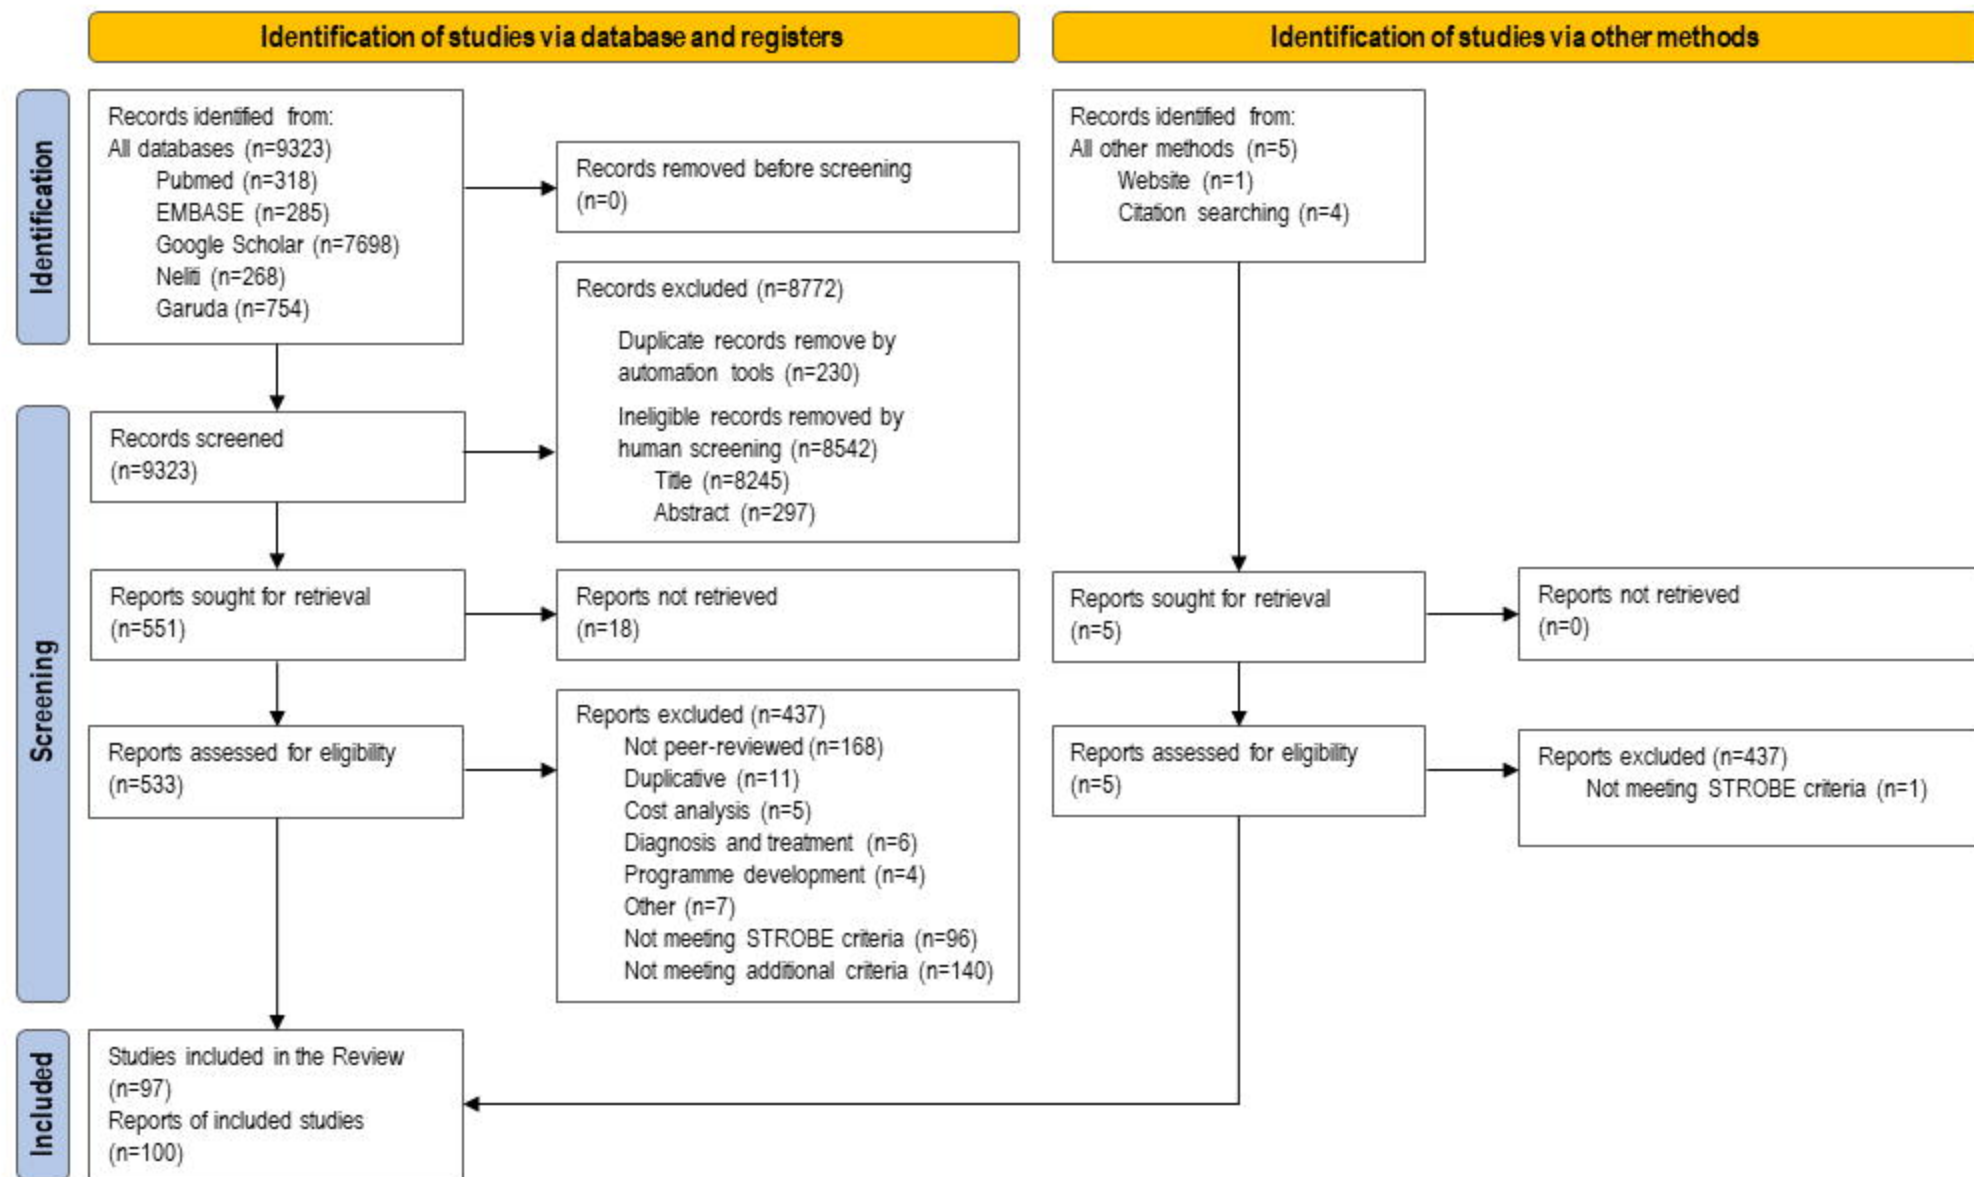



**Figure 2.** Geographical map of the 100 included reports on antibiotic use in Indonesia 2000-2021

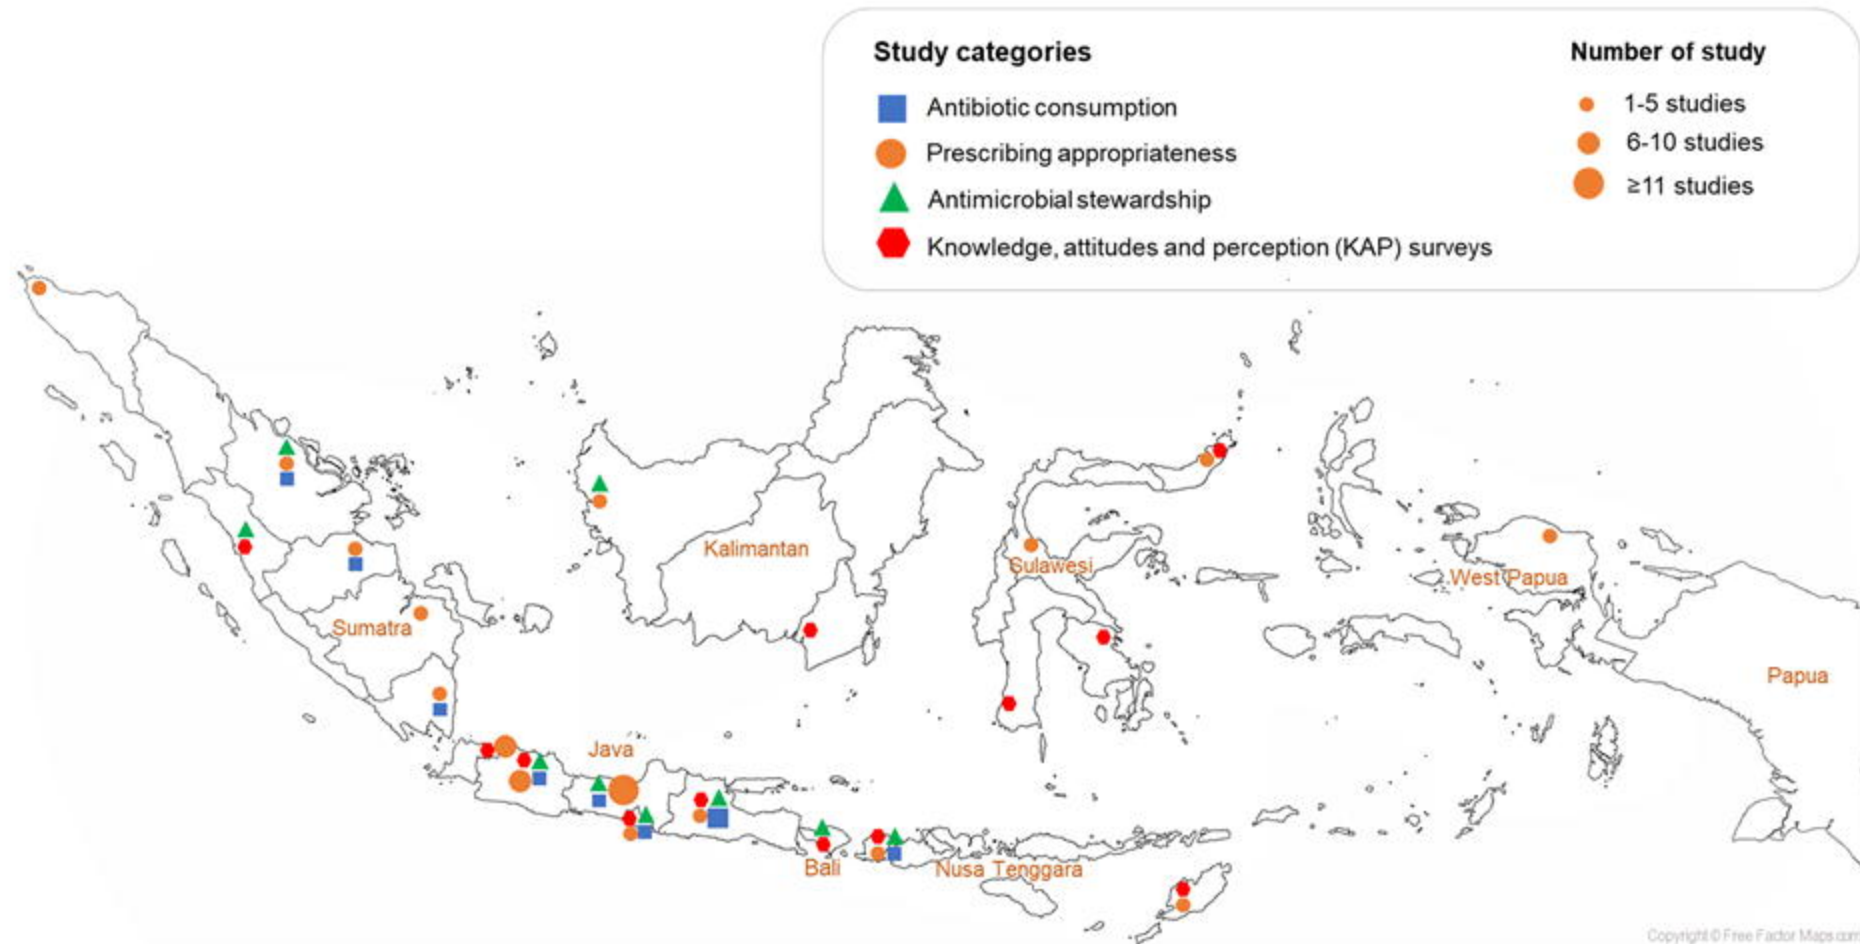

The map includes 2 KAP surveys that were conducted nationwide, and 1 AMS study and 1 KAP survey that were conducted in multiple provinces.

**Figure 3.** Summary forest plot of reports on antibiotic consumption

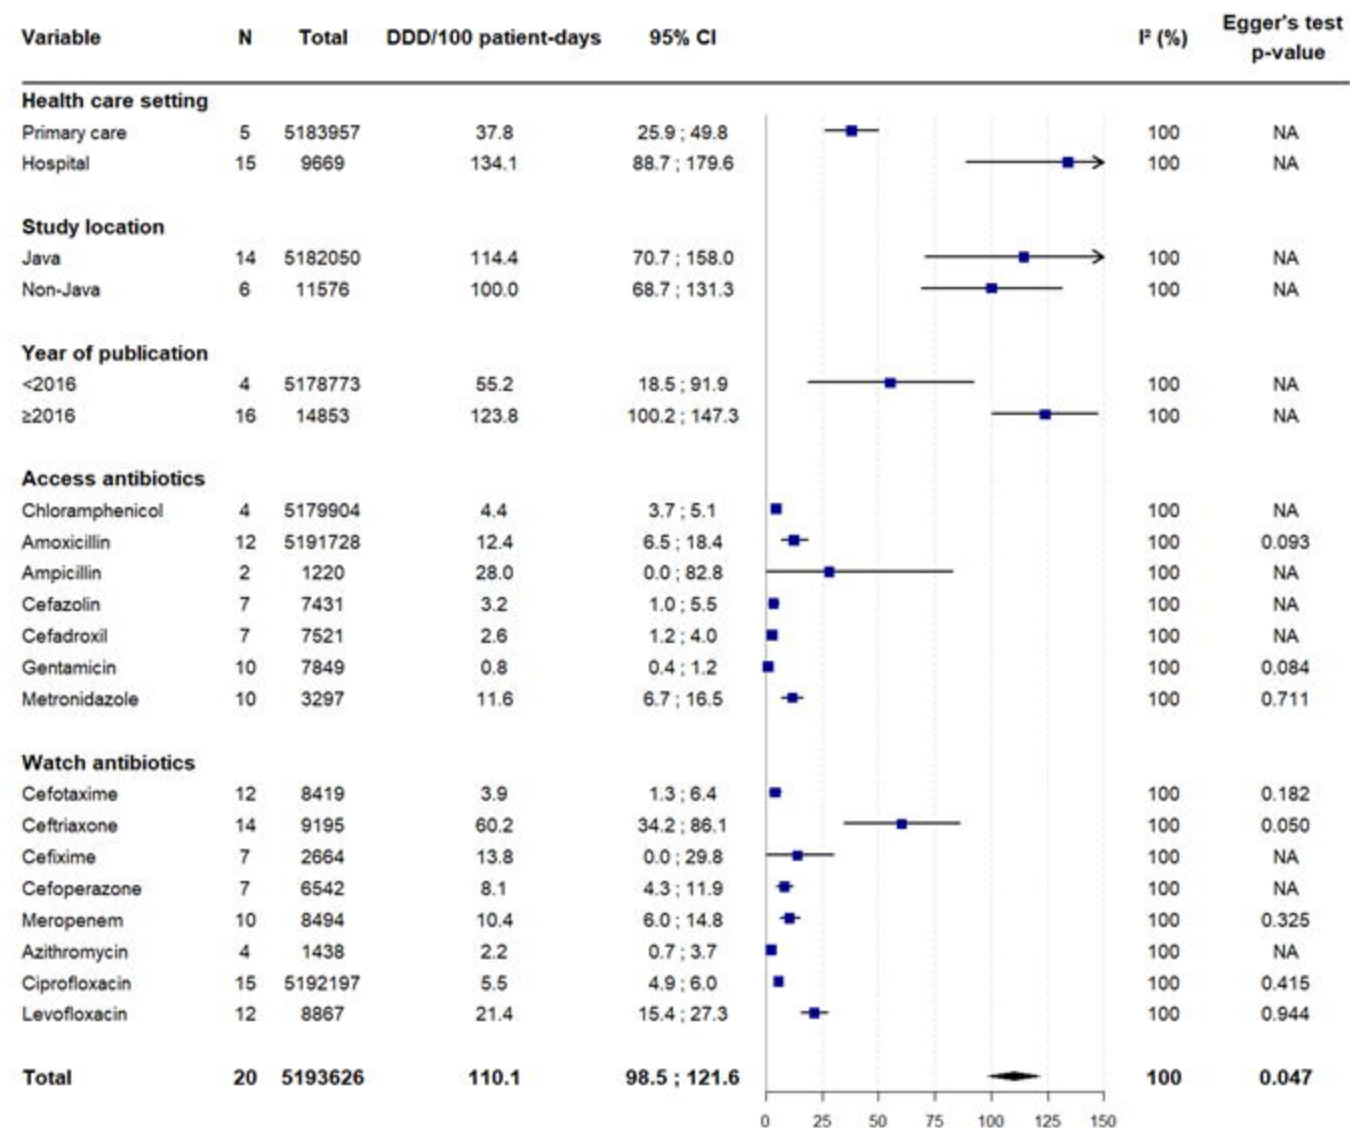

The figure summarizes 20 reports in the domain antibiotic consumption, expressed as DDD/100 patient-days, for the top-15 antibiotics. Egger's tests to assess publication bias could only be performed for the primary analysis and the individual AWARe antibiotics.

Abbreviations: CI, confidence interval; DDD, defined daily dose; NA, not applicable.

**Figure 4. Summary forest plot on prescribing appropriateness**

**(A) Overall appropriateness of antibiotic prescribing based on Gyssens method (18 reports)**

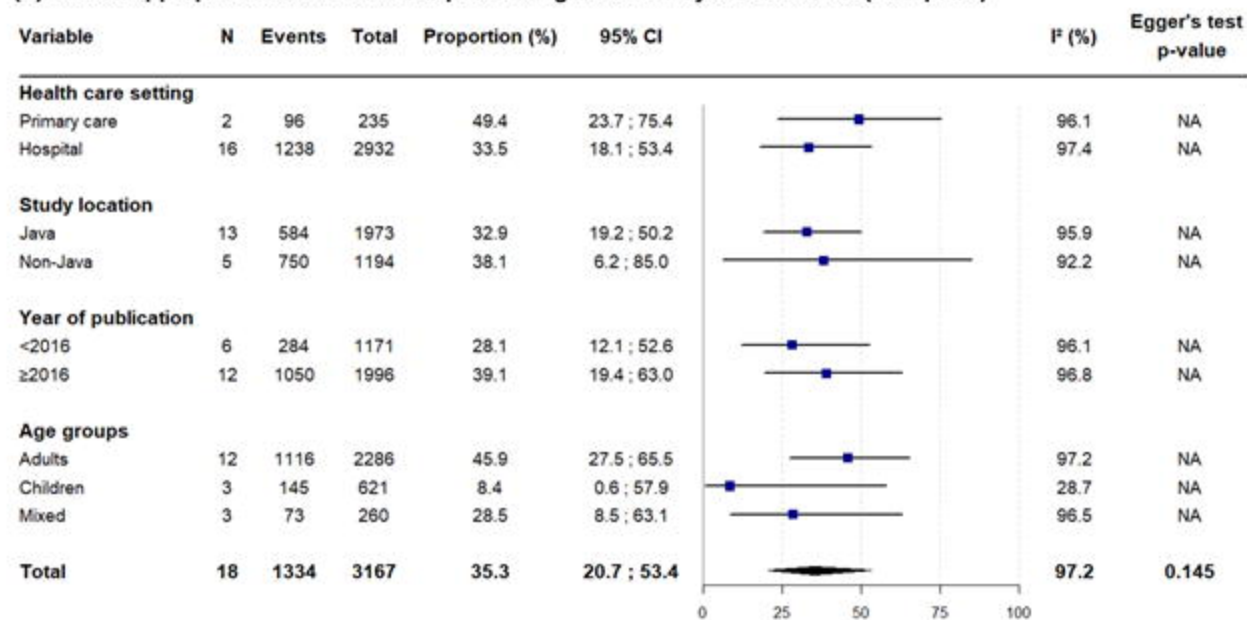

**(B) Overall appropriateness of antibiotic prescribing based on reference guidelines (31 reports)**

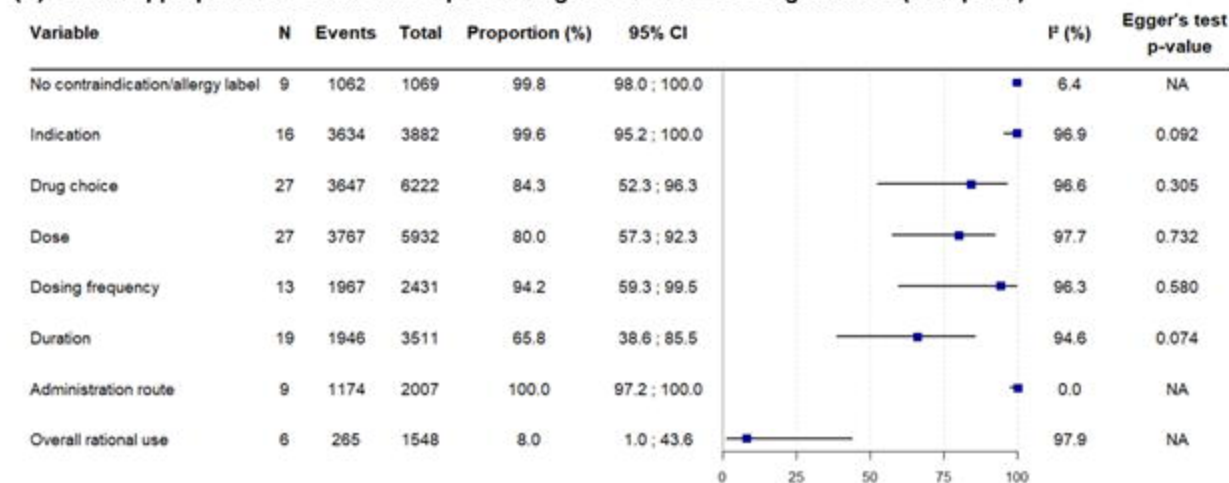

The figure summarizes 49 reports in the domain prescribing appropriateness based on Gyssens method (A) or references guidelines (B). Indicators (B) were reported by different numbers of studies. Egger's tests to assess publication bias in Gyssens method (A) could only be performed for the primary analysis. Abbreviations: CI, confidence interval; NA, not applicable.
